# Supplementary material for: Identification of Nectin-4 as a rubella virus entry receptor mediating viral shedding and congenital transmission
Source: Research Square preprint supplement (doi:10.21203/rs.3.rs-7626754/v1), 2025-11-13
Supplement: Supplementary file 1 [file b30b38c579f2eaacf277467b.xlsx]

## Sheet: Table 1
Suppementary Table 1. Statistical results of LC-MS/MS data from proximity biotin-labeled cells with APEX2-VLP.
*: If the normalized abundance of NC is 0, the fold change is set to 10.
Protein				Significant	JAR4-SMS1KO22 cells (n=3)
				Anova: p<0.01 and fold change: ≥5.0	Statistics		Fold change*	Normalized abundance
Accession	Description	name	Confidence score	True / False	Anova (p)	q Value	VLP/NC	untreated negative control (NC)	VLP
Q5JTZ9	Alanine--tRNA ligase, mitochondrial OS=Homo sapiens OX=9606 GN=AARS2 PE=1 SV=1	AARS2	317.46	FALSE	0.685862	0.536945	1.01982	11622.7	11853
Q9UNQ0	Broad substrate specificity ATP-binding cassette transporter ABCG2 OS=Homo sapiens OX=9606 GN=ABCG2 PE=1 SV=3	ABCG2	34.07	TRUE	1.10206e-08	7.52315e-07	10	0	431.571
Q9NUJ1	Mycophenolic acid acyl-glucuronide esterase, mitochondrial OS=Homo sapiens OX=9606 GN=ABHD10 PE=1 SV=1	ABHD10	33.79	FALSE	0.200419	0.242601	0.877087	32352.6	28376
Q13085	Acetyl-CoA carboxylase 1 OS=Homo sapiens OX=9606 GN=ACACA PE=1 SV=2	ACACA	15631.3	FALSE	0.0690044	0.111819	0.877178	8.84152e+06	7.75558e+06
O00763	Acetyl-CoA carboxylase 2 OS=Homo sapiens OX=9606 GN=ACACB PE=1 SV=3	ACACB	2120.92	FALSE	0.431944	0.405895	1.04552	197829	206833
P24752	Acetyl-CoA acetyltransferase, mitochondrial OS=Homo sapiens OX=9606 GN=ACAT1 PE=1 SV=1	ACAT1	66.41	FALSE	0.415281	0.398626	0.937454	3654.44	3425.87
Q99798	Aconitate hydratase, mitochondrial OS=Homo sapiens OX=9606 GN=ACO2 PE=1 SV=2	ACO2	81.38	FALSE	0.235162	0.271569	1.43636	18312.9	26304
P60709	Actin, cytoplasmic 1 OS=Homo sapiens OX=9606 GN=ACTB PE=1 SV=1	ACTB	312.74	FALSE	0.00573822	0.0139479	1.33738	3556.88	4756.88
P63261	Actin, cytoplasmic 2 OS=Homo sapiens OX=9606 GN=ACTG1 PE=1 SV=1	ACTG1	287.54	FALSE	0.141673	0.191486	1.65934	1584.74	2629.63
Q13444	Disintegrin and metalloproteinase domain-containing protein 15 OS=Homo sapiens OX=9606 GN=ADAM15 PE=1 SV=4	ADAM15	84.11	FALSE	0.577764	0.483728	1.07285	14113.8	15142
P78536	Disintegrin and metalloproteinase domain-containing protein 17 OS=Homo sapiens OX=9606 GN=ADAM17 PE=1 SV=1	ADAM17	116.48	FALSE	0.797598	0.56648	0.961225	2166.19	2082.2
Q13443	Disintegrin and metalloproteinase domain-containing protein 9 OS=Homo sapiens OX=9606 GN=ADAM9 PE=1 SV=1	ADAM9	361.43	FALSE	2.30783e-05	0.000144916	3.77093	39245.4	147992
Q8IWK6	Adhesion G protein-coupled receptor A3 OS=Homo sapiens OX=9606 GN=ADGRA3 PE=1 SV=2	ADGRA3	85.29	FALSE	0.470331	0.425709	1.09504	118406	129659
O95490	Adhesion G protein-coupled receptor L2 OS=Homo sapiens OX=9606 GN=ADGRL2 PE=1 SV=2	ADGRL2	680.96	FALSE	0.0614491	0.101403	1.20672	151089	182322
P35573	Glycogen debranching enzyme OS=Homo sapiens OX=9606 GN=AGL PE=1 SV=3	AGL	67.96	FALSE	0.34607	0.343119	0.878782	53451.7	46972.4
P54886	Delta-1-pyrroline-5-carboxylate synthase OS=Homo sapiens OX=9606 GN=ALDH18A1 PE=1 SV=2	ALDH18A1	222.92	FALSE	0.0253552	0.0493047	0.793673	10865	8623.22
P10696	Alkaline phosphatase, germ cell type OS=Homo sapiens OX=9606 GN=ALPG PE=2 SV=4	ALPG	647.23	TRUE	6.34634e-06	6.16317e-05	15.8846	6058.54	96237.3
P09923	Intestinal-type alkaline phosphatase OS=Homo sapiens OX=9606 GN=ALPI PE=1 SV=2	ALPI	153.59	TRUE	2.67241e-06	3.5021e-05	40.9985	133.796	5485.44
P05187	Alkaline phosphatase, placental type OS=Homo sapiens OX=9606 GN=ALPP PE=1 SV=2	ALPP	625.7	FALSE	0.00825202	0.0185062	2.30347	4545.98	10471.5
Q4KMQ2	Anoctamin-6 OS=Homo sapiens OX=9606 GN=ANO6 PE=1 SV=2	ANO6	251.29	FALSE	8.03136e-05	0.000382801	1.67039	53867.3	89979.4
P07355	Annexin A2 OS=Homo sapiens OX=9606 GN=ANXA2 PE=1 SV=2	ANXA2	442.47	FALSE	0.0452653	0.0807296	1.63972	22272.1	36520.1
Q06481	Amyloid-like protein 2 OS=Homo sapiens OX=9606 GN=APLP2 PE=1 SV=2	APLP2	64.91	TRUE	1.24801e-08	7.52315e-07	71554.1	0.019702	1409.76
P02647	Apolipoprotein A-I OS=Homo sapiens OX=9606 GN=APOA1 PE=1 SV=1	APOA1	100.57	TRUE	0.000483845	0.00155143	19.7622	638.122	12610.7
P04114	Apolipoprotein B-100 OS=Homo sapiens OX=9606 GN=APOB PE=1 SV=2	APOB	92.94	FALSE	0.487331	0.432473	0.871363	59715	52033.4
P02649	Apolipoprotein E OS=Homo sapiens OX=9606 GN=APOE PE=1 SV=1	APOE	89.75	FALSE	0.016834	0.0342831	1.62341	5368	8714.45
Q66PJ3	ADP-ribosylation factor-like protein 6-interacting protein 4 OS=Homo sapiens OX=9606 GN=ARL6IP4 PE=1 SV=2	ARL6IP4	71.18	FALSE	0.103265	0.153799	1.47774	611.286	903.319
Q8IZT6	Abnormal spindle-like microcephaly-associated protein OS=Homo sapiens OX=9606 GN=ASPM PE=1 SV=2	ASPM	161.07	FALSE	0.853381	0.586798	0.929951	1.39327e+06	1.29567e+06
Q96QE3	ATPase family AAA domain-containing protein 5 OS=Homo sapiens OX=9606 GN=ATAD5 PE=1 SV=4	ATAD5	52.78	FALSE	0.494261	0.435596	0.799108	126024	100707
Q8NB49	Phospholipid-transporting ATPase IG OS=Homo sapiens OX=9606 GN=ATP11C PE=1 SV=3	ATP11C	71.43	FALSE	0.168222	0.212814	1.1943	13109.7	15657
P54707	Potassium-transporting ATPase alpha chain 2 OS=Homo sapiens OX=9606 GN=ATP12A PE=1 SV=3	ATP12A	54.72	FALSE	0.216559	0.256978	0.87997	67014.9	58971.1
P05023	Sodium/potassium-transporting ATPase subunit alpha-1 OS=Homo sapiens OX=9606 GN=ATP1A1 PE=1 SV=1	ATP1A1	1030.93	FALSE	8.8532e-05	0.000410526	3.77684	12065.8	45570.6
P50993	Sodium/potassium-transporting ATPase subunit alpha-2 OS=Homo sapiens OX=9606 GN=ATP1A2 PE=1 SV=1	ATP1A2	405.44	FALSE	0.317049	0.329324	0.839181	32548.5	27314.1
P13637	Sodium/potassium-transporting ATPase subunit alpha-3 OS=Homo sapiens OX=9606 GN=ATP1A3 PE=1 SV=3	ATP1A3	459.77	FALSE	0.329783	0.336125	0.616321	1511.61	931.634
P05026	Sodium/potassium-transporting ATPase subunit beta-1 OS=Homo sapiens OX=9606 GN=ATP1B1 PE=1 SV=1	ATP1B1	51.16	TRUE	0.000121695	0.00050944	101.129	58.8515	5951.59
P54709	Sodium/potassium-transporting ATPase subunit beta-3 OS=Homo sapiens OX=9606 GN=ATP1B3 PE=1 SV=1	ATP1B3	130.64	FALSE	0.458902	0.41914	0.950541	96609.3	91831
P16615	Sarcoplasmic/endoplasmic reticulum calcium ATPase 2 OS=Homo sapiens OX=9606 GN=ATP2A2 PE=1 SV=1	ATP2A2	300.41	FALSE	0.43228	0.405895	0.942289	32686.2	30799.8
Q93084	Sarcoplasmic/endoplasmic reticulum calcium ATPase 3 OS=Homo sapiens OX=9606 GN=ATP2A3 PE=1 SV=2	ATP2A3	164.12	FALSE	0.734614	0.550671	0.923734	2074.05	1915.87
P25705	ATP synthase subunit alpha, mitochondrial OS=Homo sapiens OX=9606 GN=ATP5F1A PE=1 SV=1	ATP5F1A	421.6	FALSE	0.915944	0.605449	0.95905	68263.6	65468.2
P48047	ATP synthase subunit O, mitochondrial OS=Homo sapiens OX=9606 GN=ATP5PO PE=1 SV=1	ATP5PO	97.41	FALSE	0.472559	0.426445	0.806818	348.133	280.88
O75882	Attractin OS=Homo sapiens OX=9606 GN=ATRN PE=1 SV=2	ATRN	121.3	FALSE	0.734481	0.550671	0.960837	399030	383403
P50895	Basal cell adhesion molecule OS=Homo sapiens OX=9606 GN=BCAM PE=1 SV=2	BCAM	1060.52	FALSE	0.00033644	0.00116558	2.47942	122163	302894
P51451	Tyrosine-protein kinase Blk OS=Homo sapiens OX=9606 GN=BLK PE=1 SV=3	BLK	56.97	FALSE	0.801183	0.56648	1.09016	3715.92	4050.94
P35613	Basigin OS=Homo sapiens OX=9606 GN=BSG PE=1 SV=2	BSG	341.75	FALSE	6.23071e-05	0.00032379	2.24213	19112.8	42853.4
O43570	Carbonic anhydrase 12 OS=Homo sapiens OX=9606 GN=CA12 PE=1 SV=1	CA12	42.83	TRUE	0.000294339	0.00104372	14.5491	233.889	3402.87
Q9BY67	Cell adhesion molecule 1 OS=Homo sapiens OX=9606 GN=CADM1 PE=1 SV=2	CADM1	103.27	FALSE	0.140609	0.191486	1.98549	12591.2	24999.6
O43852	Calumenin OS=Homo sapiens OX=9606 GN=CALU PE=1 SV=2	CALU	29.36	FALSE	0.451029	0.418534	1.20952	1133.07	1370.47
P27824	Calnexin OS=Homo sapiens OX=9606 GN=CANX PE=1 SV=2	CANX	125.52	FALSE	0.00245214	0.00678067	1.33899	16180	21664.9
P04040	Catalase OS=Homo sapiens OX=9606 GN=CAT PE=1 SV=3	CAT	87.6	FALSE	0.597895	0.492166	1.16087	7692.04	8929.47
Q8NEF3	Coiled-coil domain-containing protein 112 OS=Homo sapiens OX=9606 GN=CCDC112 PE=1 SV=2	CCDC112	78.17	FALSE	0.873496	0.593753	0.982481	6161.4	6053.46
Q9NVE4	Coiled-coil domain-containing protein 87 OS=Homo sapiens OX=9606 GN=CCDC87 PE=1 SV=2	CCDC87	64.08	FALSE	0.966181	0.618261	0.997962	520247	519187
Q5ZPR3	CD276 antigen OS=Homo sapiens OX=9606 GN=CD276 PE=1 SV=1	CD276	490.19	TRUE	0.000141766	0.000562228	25.2444	3637.75	91832.9
P15529	Membrane cofactor protein OS=Homo sapiens OX=9606 GN=CD46 PE=1 SV=3	CD46	218.9	TRUE	6.66864e-05	0.000340116	91.8777	185.282	17023.2
P08174	Complement decay-accelerating factor OS=Homo sapiens OX=9606 GN=CD55 PE=1 SV=4	CD55	237.71	TRUE	5.12144e-06	5.51299e-05	40.2058	1722.36	69248.9
P19256	Lymphocyte function-associated antigen 3 OS=Homo sapiens OX=9606 GN=CD58 PE=1 SV=1	CD58	76.69	TRUE	1.34517e-05	0.000102235	46.8908	59.4105	2785.81
P13987	CD59 glycoprotein OS=Homo sapiens OX=9606 GN=CD59 PE=1 SV=1	CD59	63.74	FALSE	0.0126343	0.0266298	138.271	35.6344	4927.22
P60033	CD81 antigen OS=Homo sapiens OX=9606 GN=CD81 PE=1 SV=1	CD81	163.35	TRUE	0.000383884	0.00128562	20.0312	825.561	16537
P21926	CD9 antigen OS=Homo sapiens OX=9606 GN=CD9 PE=1 SV=4	CD9	45.02	FALSE	0.737845	0.550671	0.95669	2931.33	2804.37
Q8TCZ2	CD99 antigen-like protein 2 OS=Homo sapiens OX=9606 GN=CD99L2 PE=1 SV=1	CD99L2	152.03	TRUE	7.54177e-07	1.59408e-05	30.7835	1023.37	31502.9
P12830	Cadherin-1 OS=Homo sapiens OX=9606 GN=CDH1 PE=1 SV=3	CDH1	1144.05	TRUE	0.000135066	0.000550135	38.9765	8095.2	315523
P33151	Cadherin-5 OS=Homo sapiens OX=9606 GN=CDH5 PE=1 SV=5	CDH5	545.09	TRUE	7.04244e-06	6.43225e-05	14.4251	5352.53	77210.6
P06493	Cyclin-dependent kinase 1 OS=Homo sapiens OX=9606 GN=CDK1 PE=1 SV=3	CDK1	70.72	FALSE	0.241237	0.276466	0.881235	16426.4	14475.5
Q9NYV4	Cyclin-dependent kinase 12 OS=Homo sapiens OX=9606 GN=CDK12 PE=1 SV=2	CDK12	84.89	FALSE	0.826579	0.578043	0.983289	18748.9	18435.6
Q14004	Cyclin-dependent kinase 13 OS=Homo sapiens OX=9606 GN=CDK13 PE=1 SV=2	CDK13	102.63	FALSE	0.0710966	0.113984	1.18654	5319.12	6311.33
O94921	Cyclin-dependent kinase 14 OS=Homo sapiens OX=9606 GN=CDK14 PE=1 SV=3	CDK14	85.22	FALSE	0.50496	0.441155	0.857643	346342	297038
Q00537	Cyclin-dependent kinase 17 OS=Homo sapiens OX=9606 GN=CDK17 PE=1 SV=2	CDK17	54.76	FALSE	0.759833	0.560084	0.740403	29977.6	22195.5
Q8IZL9	Cyclin-dependent kinase 20 OS=Homo sapiens OX=9606 GN=CDK20 PE=1 SV=1	CDK20	56.29	FALSE	0.11633	0.166965	2.3776	18432	43823.9
Q00526	Cyclin-dependent kinase 3 OS=Homo sapiens OX=9606 GN=CDK3 PE=1 SV=1	CDK3	84.47	FALSE	0.798066	0.56648	1.02936	101671	104655
Q00535	Cyclin-dependent-like kinase 5 OS=Homo sapiens OX=9606 GN=CDK5 PE=1 SV=3	CDK5	50.76	FALSE	0.000105783	0.00046888	3.95323	1696.4	6706.26
Q00534	Cyclin-dependent kinase 6 OS=Homo sapiens OX=9606 GN=CDK6 PE=1 SV=1	CDK6	50.69	FALSE	0.423345	0.401256	0.763469	4423.37	3377.1
Q9NYQ6	Cadherin EGF LAG seven-pass G-type receptor 1 OS=Homo sapiens OX=9606 GN=CELSR1 PE=1 SV=1	CELSR1	203.45	FALSE	0.00353673	0.00918963	2.30407	7734.87	17821.7
Q9UHN6	Cell surface hyaluronidase OS=Homo sapiens OX=9606 GN=CEMIP2 PE=1 SV=1	CEMIP2	420.05	FALSE	0.755024	0.559139	1.02499	55869.5	57265.5
Q6ZTR5	Cilia- and flagella-associated protein 47 OS=Homo sapiens OX=9606 GN=CFAP47 PE=2 SV=5	CFAP47	85.01	FALSE	0.0116157	0.0248302	1.60806	115306	185419
Q9UPZ9	Serine/threonine-protein kinase ICK OS=Homo sapiens OX=9606 GN=CILK1 PE=1 SV=1	CILK1	60.26	FALSE	0.539313	0.457895	0.873142	8270.57	7221.38
O14493	Claudin-4 OS=Homo sapiens OX=9606 GN=CLDN4 PE=1 SV=1	CLDN4	79.41	TRUE	1.71954e-05	0.00012158	19.059	802.356	15292.1
Q9NY35	Claudin domain-containing protein 1 OS=Homo sapiens OX=9606 GN=CLDND1 PE=1 SV=1	CLDND1	49.15	TRUE	1.65815e-09	2.49889e-07	68474	0.0166842	1142.43
Q9H6B4	CXADR-like membrane protein OS=Homo sapiens OX=9606 GN=CLMP PE=1 SV=1	CLMP	70.36	FALSE	0.00129541	0.00371854	4.0272	6494.26	26153.7
P62633	Cellular nucleic acid-binding protein OS=Homo sapiens OX=9606 GN=CNBP PE=1 SV=1	CNBP	29.31	FALSE	0.00551048	0.0135032	1.52968	31404.7	48039
Q9H8M5	Metal transporter CNNM2 OS=Homo sapiens OX=9606 GN=CNNM2 PE=1 SV=2	CNNM2	88.46	FALSE	0.616473	0.502537	0.861466	17329.4	14928.7
Q6P4Q7	Metal transporter CNNM4 OS=Homo sapiens OX=9606 GN=CNNM4 PE=1 SV=3	CNNM4	195.24	FALSE	0.15893	0.206477	0.843911	354654	299297
Q5KU26	Collectin-12 OS=Homo sapiens OX=9606 GN=COLEC12 PE=1 SV=3	COLEC12	444.44	FALSE	0.000156894	0.000614141	1.99805	16351	32670.1
P09669	Cytochrome c oxidase subunit 6C OS=Homo sapiens OX=9606 GN=COX6C PE=1 SV=2	COX6C	31.96	FALSE	0.31644	0.329324	1.49717	1775.62	2658.41
Q9NZV1	Cysteine-rich motor neuron 1 protein OS=Homo sapiens OX=9606 GN=CRIM1 PE=1 SV=1	CRIM1	137.05	FALSE	0.305978	0.324042	1.23306	145561	179486
O75718	Cartilage-associated protein OS=Homo sapiens OX=9606 GN=CRTAP PE=1 SV=1	CRTAP	28.03	FALSE	0.0329487	0.0628544	1.28101	8286.37	10615
P15509	Granulocyte-macrophage colony-stimulating factor receptor subunit alpha OS=Homo sapiens OX=9606 GN=CSF2RA PE=1 SV=1	CSF2RA	63.8	TRUE	0.0030584	0.00815773	57.0955	16.0126	914.244
O60716	Catenin delta-1 OS=Homo sapiens OX=9606 GN=CTNND1 PE=1 SV=1	CTNND1	49.51	FALSE	0.251378	0.280619	0.883869	9660.72	8538.81
P78310	Coxsackievirus and adenovirus receptor OS=Homo sapiens OX=9606 GN=CXADR PE=1 SV=1	CXADR	119.86	FALSE	0.971225	0.618261	0.992423	176096	174761
P05108	Cholesterol side-chain cleavage enzyme, mitochondrial OS=Homo sapiens OX=9606 GN=CYP11A1 PE=1 SV=2	CYP11A1	520.35	FALSE	0.0848657	0.132534	1.27965	22494.7	28785.4
P11511	Aromatase OS=Homo sapiens OX=9606 GN=CYP19A1 PE=1 SV=3	CYP19A1	108.06	FALSE	0.058712	0.0988616	0.638821	3435.44	2194.63
Q14118	Dystroglycan OS=Homo sapiens OX=9606 GN=DAG1 PE=1 SV=2	DAG1	98.33	TRUE	0.00491866	0.0122522	6.32923	6622.36	41914.4
P81605	Dermcidin OS=Homo sapiens OX=9606 GN=DCD PE=1 SV=2	DCD	33.76	FALSE	0.141461	0.191486	0.064126	15.5943	1
Q8NEL9	Phospholipase DDHD1 OS=Homo sapiens OX=9606 GN=DDHD1 PE=1 SV=2	DDHD1	50.51	FALSE	0.0357162	0.0664513	2.34259	5155.29	12076.7
Q92841	Probable ATP-dependent RNA helicase DDX17 OS=Homo sapiens OX=9606 GN=DDX17 PE=1 SV=2	DDX17	59.67	FALSE	0.408288	0.395694	0.871962	76707	66885.5
P17844	Probable ATP-dependent RNA helicase DDX5 OS=Homo sapiens OX=9606 GN=DDX5 PE=1 SV=1	DDX5	53.52	FALSE	0.617225	0.502537	0.729197	4257.03	3104.21
Q5TB30	DEP domain-containing protein 1A OS=Homo sapiens OX=9606 GN=DEPDC1 PE=1 SV=2	DEPDC1	46.06	FALSE	0.451851	0.418534	0.785219	5300.04	4161.69
P36957	Dihydrolipoyllysine-residue succinyltransferase component of 2-oxoglutarate dehydrogenase complex, mitochondrial OS=Homo sapiens OX=9606 GN=DLST PE=1 SV=4	DLST	56.8	FALSE	0.0402087	0.0730071	0.681014	101879	69381.1
Q9Y485	DmX-like protein 1 OS=Homo sapiens OX=9606 GN=DMXL1 PE=1 SV=3	DMXL1	71.2	FALSE	0.0520522	0.0891416	0.869455	462167	401834
Q96N67	Dedicator of cytokinesis protein 7 OS=Homo sapiens OX=9606 GN=DOCK7 PE=1 SV=4	DOCK7	74.07	FALSE	0.392518	0.382873	1.1335	70816.7	80270.5
Q02487	Desmocollin-2 OS=Homo sapiens OX=9606 GN=DSC2 PE=1 SV=1	DSC2	1165.83	TRUE	4.4973e-05	0.000251022	8.39105	54737	459301
Q02413	Desmoglein-1 OS=Homo sapiens OX=9606 GN=DSG1 PE=1 SV=2	DSG1	85.11	FALSE	0.466994	0.425243	0.991808	425.571	422.084
Q14126	Desmoglein-2 OS=Homo sapiens OX=9606 GN=DSG2 PE=1 SV=2	DSG2	2684.41	TRUE	6.54335e-06	6.16317e-05	16.6022	47396.5	786886
P15924	Desmoplakin OS=Homo sapiens OX=9606 GN=DSP PE=1 SV=3	DSP	164.46	FALSE	0.978421	0.618917	1.02319	72333.8	74011
P42892	Endothelin-converting enzyme 1 OS=Homo sapiens OX=9606 GN=ECE1 PE=1 SV=2	ECE1	268.93	TRUE	1.8427e-05	0.000123423	12.3565	2837.16	35057.4
O43854	EGF-like repeat and discoidin I-like domain-containing protein 3 OS=Homo sapiens OX=9606 GN=EDIL3 PE=1 SV=1	EDIL3	37.49	TRUE	0.00188269	0.00525421	77.9907	27.1389	2116.58
P24530	Endothelin receptor type B OS=Homo sapiens OX=9606 GN=EDNRB PE=1 SV=1	EDNRB	52.01	TRUE	2.6675e-09	2.68001e-07	10	0	2249.75
Q5VTE0	Putative elongation factor 1-alpha-like 3 OS=Homo sapiens OX=9606 GN=EEF1A1P5 PE=5 SV=1	EEF1A1P5	256.05	FALSE	0.00432898	0.0110575	1.41819	20575.7	29180.2
P13639	Elongation factor 2 OS=Homo sapiens OX=9606 GN=EEF2 PE=1 SV=4	EEF2	134.4	FALSE	0.942217	0.614311	0.915983	3689.76	3379.75
P00533	Epidermal growth factor receptor OS=Homo sapiens OX=9606 GN=EGFR PE=1 SV=2	EGFR	2406.57	FALSE	0.000345778	0.00118432	2.16031	426491	921353
Q04637	Eukaryotic translation initiation factor 4 gamma 1 OS=Homo sapiens OX=9606 GN=EIF4G1 PE=1 SV=4	EIF4G1	60.6	FALSE	0.000257954	0.000936738	1.9106	23004.7	43952.9
Q9BW60	Elongation of very long chain fatty acids protein 1 OS=Homo sapiens OX=9606 GN=ELOVL1 PE=1 SV=1	ELOVL1	85.38	FALSE	0.118105	0.167913	0.696137	29213.5	20336.6
P17813	Endoglin OS=Homo sapiens OX=9606 GN=ENG PE=1 SV=2	ENG	482.55	FALSE	0.000124733	0.000515004	3.45572	19802.4	68431.5
P16422	Epithelial cell adhesion molecule OS=Homo sapiens OX=9606 GN=EPCAM PE=1 SV=2	EPCAM	390.24	FALSE	0.0478979	0.0839347	1.49867	37023.6	55486.2
P29317	Ephrin type-A receptor 2 OS=Homo sapiens OX=9606 GN=EPHA2 PE=1 SV=2	EPHA2	74.56	FALSE	0.177769	0.220516	2.49799	2373.88	5929.94
P54764	Ephrin type-A receptor 4 OS=Homo sapiens OX=9606 GN=EPHA4 PE=1 SV=1	EPHA4	89.19	FALSE	0.470249	0.425709	1.09811	395487	434287
Q9UF33	Ephrin type-A receptor 6 OS=Homo sapiens OX=9606 GN=EPHA6 PE=2 SV=3	EPHA6	67.54	FALSE	0.0615672	0.101403	0.818073	39272.9	32128.1
Q15375	Ephrin type-A receptor 7 OS=Homo sapiens OX=9606 GN=EPHA7 PE=1 SV=3	EPHA7	68.74	FALSE	0.265613	0.293502	0.709764	13763.9	9769.14
P54753	Ephrin type-B receptor 3 OS=Homo sapiens OX=9606 GN=EPHB3 PE=1 SV=2	EPHB3	475.84	FALSE	0.586625	0.489787	0.962204	114759	110422
P54760	Ephrin type-B receptor 4 OS=Homo sapiens OX=9606 GN=EPHB4 PE=1 SV=2	EPHB4	364.36	FALSE	0.546077	0.462335	0.926848	64151.7	59458.9
O75616	GTPase Era, mitochondrial OS=Homo sapiens OX=9606 GN=ERAL1 PE=1 SV=2	ERAL1	125.28	FALSE	0.0265236	0.0512462	1.12244	21576.5	24218.4
P04626	Receptor tyrosine-protein kinase erbB-2 OS=Homo sapiens OX=9606 GN=ERBB2 PE=1 SV=1	ERBB2	147.69	FALSE	0.000931802	0.00280852	4.31122	1689.53	7283.93
Q15303	Receptor tyrosine-protein kinase erbB-4 OS=Homo sapiens OX=9606 GN=ERBB4 PE=1 SV=1	ERBB4	187.59	FALSE	0.716147	0.54646	1.0464	10802.3	11303.4
Q96HE7	ERO1-like protein alpha OS=Homo sapiens OX=9606 GN=ERO1A PE=1 SV=2	ERO1A	73.09	FALSE	0.166575	0.212814	1.34726	1094.88	1475.08
M5A8F1	Suppressyn OS=Homo sapiens OX=9606 GN=ERVH48-1 PE=1 SV=1	ERVH48-1	184.83	TRUE	1.08672e-05	8.85257e-05	96.9004	408.084	39543.6
O95571	Persulfide dioxygenase ETHE1, mitochondrial OS=Homo sapiens OX=9606 GN=ETHE1 PE=1 SV=2	ETHE1	55.3	FALSE	0.136306	0.188458	0.907692	2474.11	2245.73
Q01844	RNA-binding protein EWS OS=Homo sapiens OX=9606 GN=EWSR1 PE=1 SV=1	EWSR1	109.19	FALSE	0.330095	0.336125	1.28243	37420.1	47988.6
Q9Y624	Junctional adhesion molecule A OS=Homo sapiens OX=9606 GN=F11R PE=1 SV=1	F11R	550.01	TRUE	5.7455e-06	5.9715e-05	49.4393	8256.21	408181
O60427	Acyl-CoA (8-3)-desaturase OS=Homo sapiens OX=9606 GN=FADS1 PE=1 SV=3	FADS1	166.58	FALSE	0.623574	0.504718	0.945209	4555.63	4306.02
Q32MH5	Protein FAM214A OS=Homo sapiens OX=9606 GN=FAM214A PE=1 SV=2	FAM214A	72.91	FALSE	0.0470154	0.08287	0.842902	73955	62336.8
Q7L8L6	FAST kinase domain-containing protein 5, mitochondrial OS=Homo sapiens OX=9606 GN=FASTKD5 PE=1 SV=1	FASTKD5	205.92	FALSE	0.00480229	0.0120686	0.389332	32174.3	12526.5
Q9NYQ8	Protocadherin Fat 2 OS=Homo sapiens OX=9606 GN=FAT2 PE=1 SV=2	FAT2	885.26	FALSE	0.00499573	0.0123422	1.34842	98348.7	132615
P62861	40S ribosomal protein S30 OS=Homo sapiens OX=9606 GN=FAU PE=1 SV=1	FAU	40.31	FALSE	0.891978	0.597441	3.1746	1423.59	4519.31
P21802	Fibroblast growth factor receptor 2 OS=Homo sapiens OX=9606 GN=FGFR2 PE=1 SV=1	FGFR2	188.05	FALSE	0.679248	0.533151	1.10414	58781.9	64903.2
P22607	Fibroblast growth factor receptor 3 OS=Homo sapiens OX=9606 GN=FGFR3 PE=1 SV=1	FGFR3	109.49	FALSE	0.161958	0.209507	0.781794	8869.88	6934.42
Q96SL8	Flt3-interacting zinc finger protein 1 OS=Homo sapiens OX=9606 GN=FIZ1 PE=1 SV=2	FIZ1	44.1	FALSE	0.633312	0.509418	0.943071	72610.5	68476.9
P15328	Folate receptor alpha OS=Homo sapiens OX=9606 GN=FOLR1 PE=1 SV=3	FOLR1	203.13	TRUE	2.11367e-07	7.96344e-06	53.0153	737.207	39083.2
Q5SZK8	FRAS1-related extracellular matrix protein 2 OS=Homo sapiens OX=9606 GN=FREM2 PE=1 SV=2	FREM2	1954.96	FALSE	0.146273	0.195079	0.777626	1.32845e+06	1.03304e+06
P35637	RNA-binding protein FUS OS=Homo sapiens OX=9606 GN=FUS PE=1 SV=1	FUS	104.77	FALSE	0.299586	0.320204	0.859279	86238.6	74103
P06241	Tyrosine-protein kinase Fyn OS=Homo sapiens OX=9606 GN=FYN PE=1 SV=3	FYN	60.74	FALSE	0.276369	0.299639	0.532836	5543.66	2953.86
Q13467	Frizzled-5 OS=Homo sapiens OX=9606 GN=FZD5 PE=1 SV=2	FZD5	118.02	FALSE	0.943661	0.614311	1.01717	245417	249631
P04406	Glyceraldehyde-3-phosphate dehydrogenase OS=Homo sapiens OX=9606 GN=GAPDH PE=1 SV=3	GAPDH	128.42	FALSE	0.000569075	0.0017867	1.90983	5291.25	10105.4
Q8IWJ2	GRIP and coiled-coil domain-containing protein 2 OS=Homo sapiens OX=9606 GN=GCC2 PE=1 SV=4	GCC2	143.2	FALSE	0.155847	0.20351	0.820505	104736	85936.2
Q5JQS6	Germinal center-associated signaling and motility-like protein OS=Homo sapiens OX=9606 GN=GCSAML PE=2 SV=1	GCSAML	36.93	FALSE	0.820934	0.575431	0.991114	1072.84	1063.31
P14136	Glial fibrillary acidic protein OS=Homo sapiens OX=9606 GN=GFAP PE=1 SV=1	GFAP	86.85	FALSE	0.672953	0.52959	1.40263	9397.4	13181.1
P23378	Glycine dehydrogenase (decarboxylating), mitochondrial OS=Homo sapiens OX=9606 GN=GLDC PE=1 SV=2	GLDC	461.54	FALSE	0.663964	0.526641	0.904242	85525.7	77336
O95838	Glucagon-like peptide 2 receptor OS=Homo sapiens OX=9606 GN=GLP2R PE=2 SV=1	GLP2R	36.56	FALSE	0.714576	0.54646	0.95872	13175.2	12631.3
Q9Y3E0	Vesicle transport protein GOT1B OS=Homo sapiens OX=9606 GN=GOLT1B PE=1 SV=1	GOLT1B	107.4	FALSE	0.948302	0.616002	0.915118	1334.82	1221.52
O75487	Glypican-4 OS=Homo sapiens OX=9606 GN=GPC4 PE=1 SV=4	GPC4	47.54	FALSE	0.600956	0.492208	1.08751	51734	56261.1
P43304	Glycerol-3-phosphate dehydrogenase, mitochondrial OS=Homo sapiens OX=9606 GN=GPD2 PE=1 SV=3	GPD2	208.34	FALSE	0.790641	0.56648	0.884818	743176	657576
O43708	Maleylacetoacetate isomerase OS=Homo sapiens OX=9606 GN=GSTZ1 PE=1 SV=3	GSTZ1	37.54	FALSE	0.958929	0.618261	1.02601	2591.95	2659.36
P13807	Glycogen [starch] synthase, muscle OS=Homo sapiens OX=9606 GN=GYS1 PE=1 SV=2	GYS1	60.82	FALSE	0.154977	0.20351	0.707859	518.943	367.339
P0C0S8	Histone H2A type 1 OS=Homo sapiens OX=9606 GN=H2AC11 PE=1 SV=2	H2AC11	88.47	FALSE	0.168751	0.212814	0.789665	10043.9	7931.31
P62805	Histone H4 OS=Homo sapiens OX=9606 GN=H4C1 PE=1 SV=2	H4C1	46.9	FALSE	0.844298	0.585601	0.970148	1513.15	1467.98
Q9P035	Very-long-chain (3R)-3-hydroxyacyl-CoA dehydratase 3 OS=Homo sapiens OX=9606 GN=HACD3 PE=1 SV=2	HACD3	65.14	FALSE	0.0565788	0.096346	1.51824	1929.46	2929.4
P40939	Trifunctional enzyme subunit alpha, mitochondrial OS=Homo sapiens OX=9606 GN=HADHA PE=1 SV=2	HADHA	765.76	FALSE	0.308553	0.324042	0.84136	66871.3	56262.9
Q96D42	Hepatitis A virus cellular receptor 1 OS=Homo sapiens OX=9606 GN=HAVCR1 PE=1 SV=3	HAVCR1	152.01	FALSE	0.456177	0.418534	0.857624	146536	125673
P08631	Tyrosine-protein kinase HCK OS=Homo sapiens OX=9606 GN=HCK PE=1 SV=5	HCK	51.72	FALSE	0.879375	0.594271	0.998374	100606	100443
P17096	High mobility group protein HMG-I/HMG-Y OS=Homo sapiens OX=9606 GN=HMGA1 PE=1 SV=3	HMGA1	61.28	FALSE	0.335022	0.336495	3.14185	1179.95	3707.21
P30519	Heme oxygenase 2 OS=Homo sapiens OX=9606 GN=HMOX2 PE=1 SV=2	HMOX2	83.14	FALSE	0.379798	0.372879	0.750256	20837	15633.1
Q13151	Heterogeneous nuclear ribonucleoprotein A0 OS=Homo sapiens OX=9606 GN=HNRNPA0 PE=1 SV=1	HNRNPA0	33.96	FALSE	0.176774	0.220516	2.06805	1545.88	3196.96
P09651	Heterogeneous nuclear ribonucleoprotein A1 OS=Homo sapiens OX=9606 GN=HNRNPA1 PE=1 SV=5	HNRNPA1	222.21	FALSE	0.00633517	0.014802	1.33077	18549.1	24684.6
Q32P51	Heterogeneous nuclear ribonucleoprotein A1-like 2 OS=Homo sapiens OX=9606 GN=HNRNPA1L2 PE=2 SV=2	HNRNPA1L2	104.05	FALSE	0.784814	0.56648	0.979262	9947	9740.72
P22626	Heterogeneous nuclear ribonucleoproteins A2/B1 OS=Homo sapiens OX=9606 GN=HNRNPA2B1 PE=1 SV=2	HNRNPA2B1	154.19	FALSE	0.0349734	0.0654734	0.92351	122215	112867
P51991	Heterogeneous nuclear ribonucleoprotein A3 OS=Homo sapiens OX=9606 GN=HNRNPA3 PE=1 SV=2	HNRNPA3	173.12	FALSE	0.219317	0.258325	0.791214	205739	162784
P52597	Heterogeneous nuclear ribonucleoprotein F OS=Homo sapiens OX=9606 GN=HNRNPF PE=1 SV=3	HNRNPF	60.92	FALSE	0.369354	0.363811	1.27029	5549.16	7049.02
P31943	Heterogeneous nuclear ribonucleoprotein H OS=Homo sapiens OX=9606 GN=HNRNPH1 PE=1 SV=4	HNRNPH1	269.43	FALSE	0.00828891	0.0185062	1.46538	3676.1	5386.86
P61978	Heterogeneous nuclear ribonucleoprotein K OS=Homo sapiens OX=9606 GN=HNRNPK PE=1 SV=1	HNRNPK	87.91	FALSE	0.705989	0.54422	0.964962	14666.5	14152.6
O43390	Heterogeneous nuclear ribonucleoprotein R OS=Homo sapiens OX=9606 GN=HNRNPR PE=1 SV=1	HNRNPR	138.7	FALSE	0.0818196	0.128443	0.770451	9405.98	7246.85
Q00839	Heterogeneous nuclear ribonucleoprotein U OS=Homo sapiens OX=9606 GN=HNRNPU PE=1 SV=6	HNRNPU	329.06	FALSE	0.117745	0.167913	1.35503	24742.8	33527.1
Q96IR7	4-hydroxyphenylpyruvate dioxygenase-like protein OS=Homo sapiens OX=9606 GN=HPDL PE=1 SV=1	HPDL	44.46	FALSE	0.14746	0.195795	1.30898	4427.47	5795.46
Q86YZ3	Hornerin OS=Homo sapiens OX=9606 GN=HRNR PE=1 SV=2	HRNR	72.27	FALSE	0.10314	0.153799	0.92421	897030	829044
Q99714	3-hydroxyacyl-CoA dehydrogenase type-2 OS=Homo sapiens OX=9606 GN=HSD17B10 PE=1 SV=3	HSD17B10	83.7	FALSE	0.360043	0.355802	0.813725	2385.81	1941.39
P07900	Heat shock protein HSP 90-alpha OS=Homo sapiens OX=9606 GN=HSP90AA1 PE=1 SV=5	HSP90AA1	112.04	FALSE	0.0918746	0.141466	2.21409	3212.66	7113.13
P08238	Heat shock protein HSP 90-beta OS=Homo sapiens OX=9606 GN=HSP90AB1 PE=1 SV=4	HSP90AB1	170.92	FALSE	0.0339428	0.0643434	0.681878	1623.34	1106.92
Q58FF8	Putative heat shock protein HSP 90-beta 2 OS=Homo sapiens OX=9606 GN=HSP90AB2P PE=1 SV=2	HSP90AB2P	34.6	FALSE	0.801328	0.56648	1.10048	4876.69	5366.71
P14625	Endoplasmin OS=Homo sapiens OX=9606 GN=HSP90B1 PE=1 SV=1	HSP90B1	289.92	FALSE	0.00696334	0.0160214	1.31952	12357.2	16305.6
P0DMV8	Heat shock 70 kDa protein 1A OS=Homo sapiens OX=9606 GN=HSPA1A PE=1 SV=1	HSPA1A	188.15	FALSE	0.00891	0.0196025	2.42879	1668.63	4052.75
P34931	Heat shock 70 kDa protein 1-like OS=Homo sapiens OX=9606 GN=HSPA1L PE=1 SV=2	HSPA1L	89.83	FALSE	0.924558	0.606531	0.830216	15747.9	13074.2
P11021	Endoplasmic reticulum chaperone BiP OS=Homo sapiens OX=9606 GN=HSPA5 PE=1 SV=2	HSPA5	146.49	FALSE	0.618569	0.502537	1.13656	212300	241293
P17066	Heat shock 70 kDa protein 6 OS=Homo sapiens OX=9606 GN=HSPA6 PE=1 SV=2	HSPA6	138.78	FALSE	0.90566	0.603921	1.004	194402	195179
P11142	Heat shock cognate 71 kDa protein OS=Homo sapiens OX=9606 GN=HSPA8 PE=1 SV=1	HSPA8	117.81	FALSE	0.690928	0.53951	1.07707	12471	13432.1
P38646	Stress-70 protein, mitochondrial OS=Homo sapiens OX=9606 GN=HSPA9 PE=1 SV=2	HSPA9	956.84	FALSE	0.799532	0.56648	1.0232	75137.7	76881.1
P10809	60 kDa heat shock protein, mitochondrial OS=Homo sapiens OX=9606 GN=HSPD1 PE=1 SV=2	HSPD1	491.32	FALSE	0.034242	0.0645048	0.934338	90067.6	84153.6
Q9NSE4	Isoleucine--tRNA ligase, mitochondrial OS=Homo sapiens OX=9606 GN=IARS2 PE=1 SV=2	IARS2	157.1	FALSE	0.5294	0.4559	0.929138	23757	22073.6
P05362	Intercellular adhesion molecule 1 OS=Homo sapiens OX=9606 GN=ICAM1 PE=1 SV=2	ICAM1	169.16	TRUE	3.73309e-05	0.000212298	125.979	75.2836	9484.18
O75144	ICOS ligand OS=Homo sapiens OX=9606 GN=ICOSLG PE=1 SV=2	ICOSLG	178.65	TRUE	1.83173e-07	7.88711e-06	10	0	4445.39
P48735	Isocitrate dehydrogenase [NADP], mitochondrial OS=Homo sapiens OX=9606 GN=IDH2 PE=1 SV=2	IDH2	156.96	FALSE	0.532981	0.456913	0.798261	57689.3	46051.1
P08069	Insulin-like growth factor 1 receptor OS=Homo sapiens OX=9606 GN=IGF1R PE=1 SV=1	IGF1R	138.19	FALSE	0.739935	0.550671	1.03417	12305.7	12726.2
P11717	Cation-independent mannose-6-phosphate receptor OS=Homo sapiens OX=9606 GN=IGF2R PE=1 SV=3	IGF2R	1473.08	FALSE	4.33927e-06	4.84403e-05	4.71745	50470.4	238092
O75054	Immunoglobulin superfamily member 3 OS=Homo sapiens OX=9606 GN=IGSF3 PE=2 SV=3	IGSF3	1236.49	TRUE	6.42588e-06	6.16317e-05	29.5737	3778.01	111730
Q969P0	Immunoglobulin superfamily member 8 OS=Homo sapiens OX=9606 GN=IGSF8 PE=1 SV=1	IGSF8	92.98	TRUE	4.57074e-07	1.37765e-05	10	0	3103.16
P40189	Interleukin-6 receptor subunit beta OS=Homo sapiens OX=9606 GN=IL6ST PE=1 SV=2	IL6ST	227.28	FALSE	7.28488e-05	0.000359953	2.6174	6418.95	16801
P06213	Insulin receptor OS=Homo sapiens OX=9606 GN=INSR PE=1 SV=4	INSR	599.02	FALSE	0.0423729	0.076476	1.0953	283521	310540
Q5JSJ4	Integrator complex subunit 6-like OS=Homo sapiens OX=9606 GN=INTS6L PE=1 SV=1	INTS6L	39.43	FALSE	0.702122	0.544022	0.896478	104711	93871.2
Q9UHH9	Inositol hexakisphosphate kinase 2 OS=Homo sapiens OX=9606 GN=IP6K2 PE=1 SV=2	IP6K2	34.87	FALSE	0.963007	0.618261	1.01978	1441.36	1469.87
Q9H095	Dynein regulatory complex protein 9 OS=Homo sapiens OX=9606 GN=IQCG PE=1 SV=1	IQCG	81.69	FALSE	0.858708	0.588229	0.949028	2423.54	2300.01
P56199	Integrin alpha-1 OS=Homo sapiens OX=9606 GN=ITGA1 PE=1 SV=2	ITGA1	160.53	TRUE	9.3451e-05	0.00042677	6.1018	2390.74	14587.8
P26006	Integrin alpha-3 OS=Homo sapiens OX=9606 GN=ITGA3 PE=1 SV=5	ITGA3	185.55	TRUE	0.000441747	0.00144044	15.3465	475.184	7292.41
P08648	Integrin alpha-5 OS=Homo sapiens OX=9606 GN=ITGA5 PE=1 SV=2	ITGA5	1449.73	TRUE	7.87135e-07	1.59408e-05	26.674	18440.3	491877
P23229	Integrin alpha-6 OS=Homo sapiens OX=9606 GN=ITGA6 PE=1 SV=5	ITGA6	1923.45	TRUE	1.08974e-06	1.93209e-05	36.0853	8187.42	295446
P06756	Integrin alpha-V OS=Homo sapiens OX=9606 GN=ITGAV PE=1 SV=2	ITGAV	805.18	TRUE	1.13614e-05	9.0116e-05	19.2691	3224.76	62138.1
P05556	Integrin beta-1 OS=Homo sapiens OX=9606 GN=ITGB1 PE=1 SV=2	ITGB1	1089.96	TRUE	6.49498e-07	1.59408e-05	60.4784	4906.5	296737
P16144	Integrin beta-4 OS=Homo sapiens OX=9606 GN=ITGB4 PE=1 SV=5	ITGB4	2263.82	FALSE	0.452839	0.418534	1.2012	1.11768e+06	1.34255e+06
P18084	Integrin beta-5 OS=Homo sapiens OX=9606 GN=ITGB5 PE=1 SV=1	ITGB5	979.11	TRUE	0.000285768	0.00102539	5.31415	12541.6	66647.8
Q9Y219	Protein jagged-2 OS=Homo sapiens OX=9606 GN=JAG2 PE=1 SV=3	JAG2	477.24	FALSE	0.000838076	0.00255154	2.78851	26908	75033.2
Q9BX67	Junctional adhesion molecule C OS=Homo sapiens OX=9606 GN=JAM3 PE=1 SV=1	JAM3	191.78	FALSE	0.0189416	0.0376376	1.58417	12828.2	20322.1
P14923	Junction plakoglobin OS=Homo sapiens OX=9606 GN=JUP PE=1 SV=3	JUP	236.61	FALSE	0.00618621	0.0146598	1.88331	12006.1	22611.3
P24390	ER lumen protein-retaining receptor 1 OS=Homo sapiens OX=9606 GN=KDELR1 PE=1 SV=1	KDELR1	38.17	FALSE	0.307171	0.324042	0.652126	976.772	636.978
P04264	Keratin, type II cytoskeletal 1 OS=Homo sapiens OX=9606 GN=KRT1 PE=1 SV=6	KRT1	3236	FALSE	0.533609	0.456913	1.13674	305895	347724
P13645	Keratin, type I cytoskeletal 10 OS=Homo sapiens OX=9606 GN=KRT10 PE=1 SV=6	KRT10	1969.61	FALSE	0.861217	0.58861	0.935859	221015	206839
P13646	Keratin, type I cytoskeletal 13 OS=Homo sapiens OX=9606 GN=KRT13 PE=1 SV=4	KRT13	450.22	FALSE	0.780109	0.56648	39.1976	129.718	5084.65
P02533	Keratin, type I cytoskeletal 14 OS=Homo sapiens OX=9606 GN=KRT14 PE=1 SV=4	KRT14	566.89	FALSE	0.48565	0.432473	0.799662	18877.6	15095.7
P19012	Keratin, type I cytoskeletal 15 OS=Homo sapiens OX=9606 GN=KRT15 PE=1 SV=3	KRT15	296.36	FALSE	0.113352	0.164256	0.551454	7643.39	4214.98
P08779	Keratin, type I cytoskeletal 16 OS=Homo sapiens OX=9606 GN=KRT16 PE=1 SV=4	KRT16	366.58	FALSE	0.739001	0.550671	0.189711	689.984	130.898
P08727	Keratin, type I cytoskeletal 19 OS=Homo sapiens OX=9606 GN=KRT19 PE=1 SV=4	KRT19	166.74	FALSE	0.30766	0.324042	1.94483	222.649	433.016
P35908	Keratin, type II cytoskeletal 2 epidermal OS=Homo sapiens OX=9606 GN=KRT2 PE=1 SV=2	KRT2	2054.65	FALSE	0.662241	0.526641	0.63845	111628	71269.1
P35900	Keratin, type I cytoskeletal 20 OS=Homo sapiens OX=9606 GN=KRT20 PE=1 SV=1	KRT20	89	FALSE	0.144668	0.194661	0.608384	421167	256232
Q7Z3Z0	Keratin, type I cytoskeletal 25 OS=Homo sapiens OX=9606 GN=KRT25 PE=1 SV=1	KRT25	70.77	FALSE	0.538374	0.457895	0.848513	14468.5	12276.7
Q7Z3Y8	Keratin, type I cytoskeletal 27 OS=Homo sapiens OX=9606 GN=KRT27 PE=1 SV=2	KRT27	75	FALSE	0.335703	0.336495	0.357755	498.566	178.365
Q7Z3Y7	Keratin, type I cytoskeletal 28 OS=Homo sapiens OX=9606 GN=KRT28 PE=1 SV=2	KRT28	107.31	FALSE	0.125548	0.176827	0.00151121	661.72	1
P12035	Keratin, type II cytoskeletal 3 OS=Homo sapiens OX=9606 GN=KRT3 PE=1 SV=3	KRT3	399.36	FALSE	0.194343	0.237151	0.838029	8194.43	6867.17
P19013	Keratin, type II cytoskeletal 4 OS=Homo sapiens OX=9606 GN=KRT4 PE=1 SV=5	KRT4	272.07	FALSE	0.854673	0.586798	11.1828	43.9773	491.787
P13647	Keratin, type II cytoskeletal 5 OS=Homo sapiens OX=9606 GN=KRT5 PE=1 SV=3	KRT5	750.49	FALSE	0.789864	0.56648	0.756661	9262.21	7008.36
P04259	Keratin, type II cytoskeletal 6B OS=Homo sapiens OX=9606 GN=KRT6B PE=1 SV=5	KRT6B	1023.93	FALSE	0.0186487	0.0374723	0.873575	28939.5	25280.8
P08729	Keratin, type II cytoskeletal 7 OS=Homo sapiens OX=9606 GN=KRT7 PE=1 SV=5	KRT7	141.3	TRUE	0.00760294	0.0172299	234.94	16.7731	3940.68
Q3SY84	Keratin, type II cytoskeletal 71 OS=Homo sapiens OX=9606 GN=KRT71 PE=1 SV=3	KRT71	158.38	FALSE	0.321366	0.331719	0.85239	10538.2	8982.69
Q14CN4	Keratin, type II cytoskeletal 72 OS=Homo sapiens OX=9606 GN=KRT72 PE=1 SV=2	KRT72	140.02	FALSE	0.760017	0.560084	1.06408	2003.99	2132.4
Q7RTS7	Keratin, type II cytoskeletal 74 OS=Homo sapiens OX=9606 GN=KRT74 PE=1 SV=2	KRT74	161.55	TRUE	9.63674e-05	0.00043352	46.7157	96.5735	4511.49
O95678	Keratin, type II cytoskeletal 75 OS=Homo sapiens OX=9606 GN=KRT75 PE=1 SV=2	KRT75	336.54	FALSE	0.427169	0.403611	0.664341	34679	23038.7
Q01546	Keratin, type II cytoskeletal 2 oral OS=Homo sapiens OX=9606 GN=KRT76 PE=1 SV=2	KRT76	197.37	FALSE	0.33604	0.336495	0.884012	8088.83	7150.63
Q7Z794	Keratin, type II cytoskeletal 1b OS=Homo sapiens OX=9606 GN=KRT77 PE=2 SV=3	KRT77	185.99	FALSE	0.965281	0.618261	0.996765	209989	209310
Q5XKE5	Keratin, type II cytoskeletal 79 OS=Homo sapiens OX=9606 GN=KRT79 PE=1 SV=2	KRT79	287.39	FALSE	0.232514	0.2701	0.538022	1316.25	708.171
P05787	Keratin, type II cytoskeletal 8 OS=Homo sapiens OX=9606 GN=KRT8 PE=1 SV=7	KRT8	218.75	FALSE	0.395502	0.38454	1.17402	23252.6	27299
Q6KB66	Keratin, type II cytoskeletal 80 OS=Homo sapiens OX=9606 GN=KRT80 PE=1 SV=2	KRT80	97.73	FALSE	0.0220676	0.0431905	1.7537	6491.25	11383.7
Q9NSB2	Keratin, type II cuticular Hb4 OS=Homo sapiens OX=9606 GN=KRT84 PE=2 SV=2	KRT84	78.69	FALSE	0.770067	0.563358	0.591375	1314.46	777.339
P35527	Keratin, type I cytoskeletal 9 OS=Homo sapiens OX=9606 GN=KRT9 PE=1 SV=3	KRT9	2607.03	FALSE	0.512293	0.443704	1.15042	315143	362546
Q9H9P8	L-2-hydroxyglutarate dehydrogenase, mitochondrial OS=Homo sapiens OX=9606 GN=L2HGDH PE=1 SV=3	L2HGDH	158.7	FALSE	0.727136	0.550671	0.939218	104681	98318.4
P25391	Laminin subunit alpha-1 OS=Homo sapiens OX=9606 GN=LAMA1 PE=1 SV=2	LAMA1	384.47	FALSE	0.210286	0.250521	1.57748	23521.4	37104.6
O15230	Laminin subunit alpha-5 OS=Homo sapiens OX=9606 GN=LAMA5 PE=1 SV=8	LAMA5	575.8	FALSE	0.00112248	0.00328469	1.75967	24154.1	42503.4
P07942	Laminin subunit beta-1 OS=Homo sapiens OX=9606 GN=LAMB1 PE=1 SV=2	LAMB1	527.08	FALSE	0.00352757	0.00918963	1.54669	63729.4	98569.4
P11047	Laminin subunit gamma-1 OS=Homo sapiens OX=9606 GN=LAMC1 PE=1 SV=3	LAMC1	961.51	FALSE	0.059862	0.100238	1.18811	250956	298163
P06239	Tyrosine-protein kinase Lck OS=Homo sapiens OX=9606 GN=LCK PE=1 SV=6	LCK	51.8	FALSE	0.720306	0.548246	0.936781	5027.52	4709.68
P00338	L-lactate dehydrogenase A chain OS=Homo sapiens OX=9606 GN=LDHA PE=1 SV=2	LDHA	60.78	FALSE	0.420063	0.400775	0.883601	5294.16	4677.93
P01130	Low-density lipoprotein receptor OS=Homo sapiens OX=9606 GN=LDLR PE=1 SV=1	LDLR	253.47	FALSE	0.800149	0.56648	1.01846	106163	108123
P42702	Leukemia inhibitory factor receptor OS=Homo sapiens OX=9606 GN=LIFR PE=1 SV=1	LIFR	173.25	TRUE	0.000166024	0.00064155	9.88072	582.639	5756.89
Q12907	Vesicular integral-membrane protein VIP36 OS=Homo sapiens OX=9606 GN=LMAN2 PE=1 SV=1	LMAN2	104.56	FALSE	0.974343	0.618261	1.08166	908.332	982.504
Q8NF37	Lysophosphatidylcholine acyltransferase 1 OS=Homo sapiens OX=9606 GN=LPCAT1 PE=1 SV=2	LPCAT1	113.38	FALSE	0.845158	0.585601	1.15356	3323.64	3834.02
Q07954	Prolow-density lipoprotein receptor-related protein 1 OS=Homo sapiens OX=9606 GN=LRP1 PE=1 SV=2	LRP1	5699.63	TRUE	3.46411e-07	1.16012e-05	12.1344	101372	1.23009e+06
Q9NZR2	Low-density lipoprotein receptor-related protein 1B OS=Homo sapiens OX=9606 GN=LRP1B PE=1 SV=2	LRP1B	130.08	FALSE	8.1283e-05	0.000382801	3.72702	11504.9	42879
P98164	Low-density lipoprotein receptor-related protein 2 OS=Homo sapiens OX=9606 GN=LRP2 PE=1 SV=3	LRP2	6965.8	TRUE	3.589e-06	4.16058e-05	23.0837	84478.6	1.95008e+06
O75197	Low-density lipoprotein receptor-related protein 5 OS=Homo sapiens OX=9606 GN=LRP5 PE=1 SV=2	LRP5	110.5	FALSE	0.220985	0.259169	0.800057	9625.12	7700.64
O75581	Low-density lipoprotein receptor-related protein 6 OS=Homo sapiens OX=9606 GN=LRP6 PE=1 SV=2	LRP6	900.34	TRUE	7.22039e-07	1.59408e-05	19.0936	3139.15	59937.7
P30533	Alpha-2-macroglobulin receptor-associated protein OS=Homo sapiens OX=9606 GN=LRPAP1 PE=1 SV=1	LRPAP1	46.76	FALSE	0.590455	0.490269	1.31868	4897.61	6458.39
P42704	Leucine-rich PPR motif-containing protein, mitochondrial OS=Homo sapiens OX=9606 GN=LRPPRC PE=1 SV=3	LRPPRC	972.58	FALSE	0.734916	0.550671	0.959436	41907.8	40207.9
Q7L1W4	Volume-regulated anion channel subunit LRRC8D OS=Homo sapiens OX=9606 GN=LRRC8D PE=1 SV=1	LRRC8D	153.23	FALSE	0.0376266	0.069152	1.29145	15593.8	20138.6
Q86X29	Lipolysis-stimulated lipoprotein receptor OS=Homo sapiens OX=9606 GN=LSR PE=1 SV=4	LSR	220.6	FALSE	0.0925526	0.141604	0.713964	278183	198613
Q9Y383	Putative RNA-binding protein Luc7-like 2 OS=Homo sapiens OX=9606 GN=LUC7L2 PE=1 SV=2	LUC7L2	86.36	FALSE	0.643269	0.514286	1.15217	599.576	690.814
O95232	Luc7-like protein 3 OS=Homo sapiens OX=9606 GN=LUC7L3 PE=1 SV=2	LUC7L3	122.84	FALSE	0.694883	0.541195	0.952807	9841.57	9377.12
P07948	Tyrosine-protein kinase Lyn OS=Homo sapiens OX=9606 GN=LYN PE=1 SV=3	LYN	70.73	FALSE	0.0776516	0.123183	1.36657	11814.5	16145.3
O95274	Ly6/PLAUR domain-containing protein 3 OS=Homo sapiens OX=9606 GN=LYPD3 PE=1 SV=2	LYPD3	152.91	TRUE	2.3061e-05	0.000144916	67.4133	177.072	11937
P20645	Cation-dependent mannose-6-phosphate receptor OS=Homo sapiens OX=9606 GN=M6PR PE=1 SV=1	M6PR	84.8	TRUE	0.00915214	0.0198455	156.222	12.9198	2018.36
Q9BQ69	ADP-ribose glycohydrolase MACROD1 OS=Homo sapiens OX=9606 GN=MACROD1 PE=1 SV=2	MACROD1	43.54	FALSE	0.0273797	0.0525633	0.790521	14828.3	11722.1
P20794	Serine/threonine-protein kinase MAK OS=Homo sapiens OX=9606 GN=MAK PE=1 SV=2	MAK	72.87	FALSE	0.599272	0.492166	0.873586	348429	304382
Q8N4S9	MARVEL domain-containing protein 2 OS=Homo sapiens OX=9606 GN=MARVELD2 PE=1 SV=2	MARVELD2	73.66	FALSE	0.00184976	0.00521057	2.14013	2455.74	5255.6
Q96RQ3	Methylcrotonoyl-CoA carboxylase subunit alpha, mitochondrial OS=Homo sapiens OX=9606 GN=MCCC1 PE=1 SV=3	MCCC1	5953.43	FALSE	0.0977125	0.148744	0.850998	7.64717e+06	6.50772e+06
Q12866	Tyrosine-protein kinase Mer OS=Homo sapiens OX=9606 GN=MERTK PE=1 SV=2	MERTK	162.71	TRUE	0.0016053	0.00456461	9.00142	2235.97	20126.9
Q08431	Lactadherin OS=Homo sapiens OX=9606 GN=MFGE8 PE=1 SV=3	MFGE8	477.67	TRUE	5.72183e-05	0.000302562	17.1328	1488.29	25498.6
O14880	Microsomal glutathione S-transferase 3 OS=Homo sapiens OX=9606 GN=MGST3 PE=1 SV=1	MGST3	78.68	FALSE	0.219408	0.258325	1.38448	1992.63	2758.76
P50281	Matrix metalloproteinase-14 OS=Homo sapiens OX=9606 GN=MMP14 PE=1 SV=3	MMP14	795.56	FALSE	0.0111833	0.0240766	5.93818	20446.7	121416
P51511	Matrix metalloproteinase-15 OS=Homo sapiens OX=9606 GN=MMP15 PE=1 SV=1	MMP15	69.28	TRUE	0.000444452	0.00144044	910.554	1.12224	1021.86
Q9Y5R2	Matrix metalloproteinase-24 OS=Homo sapiens OX=9606 GN=MMP24 PE=2 SV=1	MMP24	44.04	FALSE	0.590375	0.490269	1.60636	2429.92	3903.33
Q9BU76	Multiple myeloma tumor-associated protein 2 OS=Homo sapiens OX=9606 GN=MMTAG2 PE=1 SV=1	MMTAG2	45.79	FALSE	0.285489	0.306222	0.741239	424.704	314.807
O95297	Myelin protein zero-like protein 1 OS=Homo sapiens OX=9606 GN=MPZL1 PE=1 SV=1	MPZL1	370.37	FALSE	0.0214829	0.0423208	1.27254	215259	273924
Q9BYC8	39S ribosomal protein L32, mitochondrial OS=Homo sapiens OX=9606 GN=MRPL32 PE=1 SV=1	MRPL32	58.05	FALSE	0.917994	0.605449	1.09529	28621.1	31348.4
Q6UB35	Monofunctional C1-tetrahydrofolate synthase, mitochondrial OS=Homo sapiens OX=9606 GN=MTHFD1L PE=1 SV=1	MTHFD1L	650.3	FALSE	0.704145	0.544191	1.02512	16192.8	16599.6
Q9BRK3	Matrix remodeling-associated protein 8 OS=Homo sapiens OX=9606 GN=MXRA8 PE=1 SV=1	MXRA8	579.68	FALSE	2.41212e-05	0.000148373	3.01014	22038.6	66339.1
Q96S97	Myeloid-associated differentiation marker OS=Homo sapiens OX=9606 GN=MYADM PE=1 SV=2	MYADM	144.81	TRUE	2.14495e-06	3.07858e-05	53.8065	274.192	14753.3
Q96LU7	Myelin regulatory factor-like protein OS=Homo sapiens OX=9606 GN=MYRFL PE=2 SV=2	MYRFL	70.18	FALSE	0.916193	0.605449	1.03117	77948.6	80378.4
Q8IZF0	Sodium leak channel non-selective protein OS=Homo sapiens OX=9606 GN=NALCN PE=1 SV=1	NALCN	54.22	FALSE	0.410134	0.39621	1.09177	31843.5	34765.9
P13591	Neural cell adhesion molecule 1 OS=Homo sapiens OX=9606 GN=NCAM1 PE=1 SV=3	NCAM1	563.2	TRUE	0.000190082	0.000716151	5.53678	14684.8	81306.7
Q92542	Nicastrin OS=Homo sapiens OX=9606 GN=NCSTN PE=1 SV=2	NCSTN	50.73	FALSE	0.237254	0.272939	1.35523	2001.47	2712.45
P28331	NADH-ubiquinone oxidoreductase 75 kDa subunit, mitochondrial OS=Homo sapiens OX=9606 GN=NDUFS1 PE=1 SV=3	NDUFS1	235.12	FALSE	0.847406	0.585813	0.970598	189190	183628
O75380	NADH dehydrogenase [ubiquinone] iron-sulfur protein 6, mitochondrial OS=Homo sapiens OX=9606 GN=NDUFS6 PE=1 SV=1	NDUFS6	50.18	FALSE	0.280858	0.302331	1.15102	16420.6	18900.5
Q15223	Nectin-1 OS=Homo sapiens OX=9606 GN=NECTIN1 PE=1 SV=3	NECTIN1	180.53	TRUE	0.000579621	0.00180105	12.5468	646.085	8106.29
Q92692	Nectin-2 OS=Homo sapiens OX=9606 GN=NECTIN2 PE=1 SV=1	NECTIN2	463.82	FALSE	0.00121011	0.00350708	1.7536	11635.7	20404.4
Q9NQS3	Nectin-3 OS=Homo sapiens OX=9606 GN=NECTIN3 PE=1 SV=1	NECTIN3	177.85	FALSE	0.257747	0.286667	1.69117	8571.87	14496.5
Q96NY8	Nectin-4 OS=Homo sapiens OX=9606 GN=NECTIN4 PE=1 SV=1	NECTIN4	341.54	TRUE	6.77055e-05	0.000340116	12.4043	1200.84	14895.5
P46531	Neurogenic locus notch homolog protein 1 OS=Homo sapiens OX=9606 GN=NOTCH1 PE=1 SV=4	NOTCH1	40.97	FALSE	0.495894	0.435761	1.21704	37028	45064.7
Q04721	Neurogenic locus notch homolog protein 2 OS=Homo sapiens OX=9606 GN=NOTCH2 PE=1 SV=3	NOTCH2	263.03	FALSE	0.00031887	0.00111755	2.1599	11075.6	23922.2
P06748	Nucleophosmin OS=Homo sapiens OX=9606 GN=NPM1 PE=1 SV=2	NPM1	133.35	FALSE	0.104049	0.153799	0.961226	43595.1	41904.7
Q9Y639	Neuroplastin OS=Homo sapiens OX=9606 GN=NPTN PE=1 SV=2	NPTN	95.54	TRUE	0.00622566	0.0146598	357.724	16.4797	5895.18
Q16625	Occludin OS=Homo sapiens OX=9606 GN=OCLN PE=1 SV=1	OCLN	658.73	TRUE	1.3736e-06	2.30007e-05	18.0493	14548.9	262597
P78380	Oxidized low-density lipoprotein receptor 1 OS=Homo sapiens OX=9606 GN=OLR1 PE=1 SV=1	OLR1	60.85	FALSE	0.00480489	0.0120686	2.11114	2021.14	4266.91
Q9UBD5	Origin recognition complex subunit 3 OS=Homo sapiens OX=9606 GN=ORC3 PE=1 SV=1	ORC3	85.97	FALSE	0.66011	0.526354	1.11764	30824.4	34450.7
P32242	Homeobox protein OTX1 OS=Homo sapiens OX=9606 GN=OTX1 PE=1 SV=1	OTX1	29.23	FALSE	0.701758	0.544022	0.927772	15018.9	13934.1
P07237	Protein disulfide-isomerase OS=Homo sapiens OX=9606 GN=P4HB PE=1 SV=3	P4HB	90.51	FALSE	0.0919933	0.141466	0.890885	7268.68	6475.56
P11498	Pyruvate carboxylase, mitochondrial OS=Homo sapiens OX=9606 GN=PC PE=1 SV=2	PC	12061.9	FALSE	0.0469832	0.08287	0.91125	3.71229e+07	3.38282e+07
Q15365	Poly(rC)-binding protein 1 OS=Homo sapiens OX=9606 GN=PCBP1 PE=1 SV=2	PCBP1	45.85	FALSE	0.0647879	0.105554	0.767137	60364	46307.5
P05165	Propionyl-CoA carboxylase alpha chain, mitochondrial OS=Homo sapiens OX=9606 GN=PCCA PE=1 SV=4	PCCA	9719.37	FALSE	0.341469	0.340798	0.920626	1.60078e+07	1.47372e+07
P05166	Propionyl-CoA carboxylase beta chain, mitochondrial OS=Homo sapiens OX=9606 GN=PCCB PE=1 SV=3	PCCB	858	FALSE	0.071871	0.114616	0.945922	75755.4	71658.7
P35558	Phosphoenolpyruvate carboxykinase, cytosolic [GTP] OS=Homo sapiens OX=9606 GN=PCK1 PE=1 SV=3	PCK1	61.48	FALSE	0.597565	0.492166	0.837486	59533.2	49858.2
Q16822	Phosphoenolpyruvate carboxykinase [GTP], mitochondrial OS=Homo sapiens OX=9606 GN=PCK2 PE=1 SV=4	PCK2	715.83	FALSE	0.624603	0.504718	0.957413	66066.5	63252.9
P30101	Protein disulfide-isomerase A3 OS=Homo sapiens OX=9606 GN=PDIA3 PE=1 SV=4	PDIA3	78.48	FALSE	0.82049	0.575431	1.12219	2946.43	3306.47
Q15084	Protein disulfide-isomerase A6 OS=Homo sapiens OX=9606 GN=PDIA6 PE=1 SV=1	PDIA6	307.74	FALSE	0.303767	0.323525	1.12554	14451.7	16265.9
Q96FX8	p53 apoptosis effector related to PMP-22 OS=Homo sapiens OX=9606 GN=PERP PE=2 SV=1	PERP	27.09	TRUE	0.00908759	0.0198455	196.691	19.0488	3746.72
O00264	Membrane-associated progesterone receptor component 1 OS=Homo sapiens OX=9606 GN=PGRMC1 PE=1 SV=3	PGRMC1	62.74	FALSE	0.666132	0.526974	0.965273	76006.4	73367
Q7RTV0	PHD finger-like domain-containing protein 5A OS=Homo sapiens OX=9606 GN=PHF5A PE=1 SV=1	PHF5A	129.77	FALSE	0.151983	0.200916	1.68205	10617.4	17859
P12273	Prolactin-inducible protein OS=Homo sapiens OX=9606 GN=PIP PE=1 SV=1	PIP	53.42	FALSE	0.922919	0.606531	2.91035	34.2808	99.7689
Q5JRX3	Presequence protease, mitochondrial OS=Homo sapiens OX=9606 GN=PITRM1 PE=1 SV=3	PITRM1	60.14	FALSE	0.0362251	0.0669847	0.938802	51556	48400.8
Q13835	Plakophilin-1 OS=Homo sapiens OX=9606 GN=PKP1 PE=1 SV=2	PKP1	118.21	FALSE	0.244176	0.27668	1.20569	5423.74	6539.35
O75051	Plexin-A2 OS=Homo sapiens OX=9606 GN=PLXNA2 PE=1 SV=4	PLXNA2	840.83	TRUE	0.000174877	0.000667203	18.0982	1812.55	32803.8
P51805	Plexin-A3 OS=Homo sapiens OX=9606 GN=PLXNA3 PE=1 SV=2	PLXNA3	103.74	FALSE	0.709906	0.545402	0.805467	1.6397e+06	1.32073e+06
Q9HCM2	Plexin-A4 OS=Homo sapiens OX=9606 GN=PLXNA4 PE=1 SV=4	PLXNA4	120.69	FALSE	0.345636	0.343119	1.13459	2065.36	2343.34
O43157	Plexin-B1 OS=Homo sapiens OX=9606 GN=PLXNB1 PE=1 SV=3	PLXNB1	68.52	TRUE	0.000532516	0.00168952	67.4849	58.0162	3915.22
O15031	Plexin-B2 OS=Homo sapiens OX=9606 GN=PLXNB2 PE=1 SV=3	PLXNB2	928.54	TRUE	1.79299e-06	2.7021e-05	7.88203	9137.75	72024.1
Q9Y4D7	Plexin-D1 OS=Homo sapiens OX=9606 GN=PLXND1 PE=1 SV=3	PLXND1	282.19	FALSE	0.420179	0.400775	0.773153	205227	158672
O75439	Mitochondrial-processing peptidase subunit beta OS=Homo sapiens OX=9606 GN=PMPCB PE=1 SV=2	PMPCB	336.31	FALSE	0.842978	0.585601	1.04358	79294.2	82750.1
O00411	DNA-directed RNA polymerase, mitochondrial OS=Homo sapiens OX=9606 GN=POLRMT PE=1 SV=2	POLRMT	58.41	FALSE	0.137009	0.188563	0.883006	203176	179405
P0CG39	POTE ankyrin domain family member J OS=Homo sapiens OX=9606 GN=POTEJ PE=3 SV=1	POTEJ	101.37	FALSE	0.794164	0.56648	1.04061	3.5381e+06	3.68177e+06
Q06830	Peroxiredoxin-1 OS=Homo sapiens OX=9606 GN=PRDX1 PE=1 SV=1	PRDX1	187.93	FALSE	0.0573532	0.0971162	1.53905	13627.6	20973.6
P30048	Thioredoxin-dependent peroxide reductase, mitochondrial OS=Homo sapiens OX=9606 GN=PRDX3 PE=1 SV=3	PRDX3	52.69	FALSE	0.962852	0.618261	1.0028	1111.54	1114.65
Q13162	Peroxiredoxin-4 OS=Homo sapiens OX=9606 GN=PRDX4 PE=1 SV=1	PRDX4	437.53	FALSE	0.0989092	0.149809	0.654764	123380	80784.7
P30044	Peroxiredoxin-5, mitochondrial OS=Homo sapiens OX=9606 GN=PRDX5 PE=1 SV=4	PRDX5	48.56	FALSE	0.146034	0.195079	1.55441	1487.59	2312.32
P04156	Major prion protein OS=Homo sapiens OX=9606 GN=PRNP PE=1 SV=1	PRNP	87.77	TRUE	1.35677e-05	0.000102235	100.557	38.631	3884.62
Q9UNN8	Endothelial protein C receptor OS=Homo sapiens OX=9606 GN=PROCR PE=1 SV=1	PROCR	24.62	FALSE	0.0897566	0.13945	13.3321	77.2965	1030.53
Q9Y520	Protein PRRC2C OS=Homo sapiens OX=9606 GN=PRRC2C PE=1 SV=4	PRRC2C	91.1	FALSE	0.959198	0.618261	1.00056	51781.1	51810.1
P07478	Trypsin-2 OS=Homo sapiens OX=9606 GN=PRSS2 PE=1 SV=1	PRSS2	236.9	FALSE	0.317953	0.329324	0.893279	1.87082e+06	1.67117e+06
P35030	Trypsin-3 OS=Homo sapiens OX=9606 GN=PRSS3 PE=1 SV=2	PRSS3	97.4	FALSE	0.456849	0.418534	0.90538	7456.74	6751.18
Q16651	Prostasin OS=Homo sapiens OX=9606 GN=PRSS8 PE=1 SV=1	PRSS8	183.07	TRUE	0.0010675	0.00315443	7.01148	2692.1	18875.6
Q9P2B2	Prostaglandin F2 receptor negative regulator OS=Homo sapiens OX=9606 GN=PTGFRN PE=1 SV=2	PTGFRN	281.32	FALSE	0.00095559	0.0028517	1.63894	13260.8	21733.7
P10586	Receptor-type tyrosine-protein phosphatase F OS=Homo sapiens OX=9606 GN=PTPRF PE=1 SV=2	PTPRF	1579	TRUE	2.45339e-06	3.36122e-05	10.2445	23144.9	237108
P23470	Receptor-type tyrosine-protein phosphatase gamma OS=Homo sapiens OX=9606 GN=PTPRG PE=1 SV=4	PTPRG	33.39	FALSE	0.185809	0.229525	0.81921	13158.4	10779.5
Q12913	Receptor-type tyrosine-protein phosphatase eta OS=Homo sapiens OX=9606 GN=PTPRJ PE=1 SV=3	PTPRJ	153.35	TRUE	3.39191e-05	0.00020046	100.208	33.0334	3310.21
Q15262	Receptor-type tyrosine-protein phosphatase kappa OS=Homo sapiens OX=9606 GN=PTPRK PE=1 SV=2	PTPRK	86.33	FALSE	0.334262	0.336495	1.3559	68474	92844.2
P15151	Poliovirus receptor OS=Homo sapiens OX=9606 GN=PVR PE=1 SV=2	PVR	32.99	TRUE	4.6924e-05	0.00025715	31.7551	78.9283	2506.37
P32322	Pyrroline-5-carboxylate reductase 1, mitochondrial OS=Homo sapiens OX=9606 GN=PYCR1 PE=1 SV=2	PYCR1	1446.86	FALSE	0.979483	0.618917	1.00136	124034	124203
Q96C36	Pyrroline-5-carboxylate reductase 2 OS=Homo sapiens OX=9606 GN=PYCR2 PE=1 SV=1	PYCR2	212.05	FALSE	0.44475	0.416307	0.858184	838.396	719.498
P61026	Ras-related protein Rab-10 OS=Homo sapiens OX=9606 GN=RAB10 PE=1 SV=1	RAB10	115.89	FALSE	0.507758	0.442317	1.10203	191.111	210.611
Q6IQ22	Ras-related protein Rab-12 OS=Homo sapiens OX=9606 GN=RAB12 PE=1 SV=3	RAB12	51.5	FALSE	0.0636965	0.10434	0.618644	22304.4	13798.5
P51153	Ras-related protein Rab-13 OS=Homo sapiens OX=9606 GN=RAB13 PE=1 SV=1	RAB13	48.79	FALSE	0.327444	0.335693	0.762769	6664.42	5083.41
Q9H0U4	Ras-related protein Rab-1B OS=Homo sapiens OX=9606 GN=RAB1B PE=1 SV=1	RAB1B	117.07	FALSE	0.636093	0.509902	1.03484	206992	214204
Q9H082	Ras-related protein Rab-33B OS=Homo sapiens OX=9606 GN=RAB33B PE=1 SV=1	RAB33B	49.09	FALSE	0.804118	0.56648	1.02783	2321.29	2385.89
Q15286	Ras-related protein Rab-35 OS=Homo sapiens OX=9606 GN=RAB35 PE=1 SV=1	RAB35	81.88	FALSE	0.108939	0.158623	2.02899	6150.31	12478.9
Q96AX2	Ras-related protein Rab-37 OS=Homo sapiens OX=9606 GN=RAB37 PE=1 SV=3	RAB37	52.57	FALSE	0.596236	0.492166	0.957262	19353.2	18526.1
Q96DA2	Ras-related protein Rab-39B OS=Homo sapiens OX=9606 GN=RAB39B PE=1 SV=1	RAB39B	41.17	FALSE	0.0999349	0.150605	1.23151	186848	230105
P20337	Ras-related protein Rab-3B OS=Homo sapiens OX=9606 GN=RAB3B PE=1 SV=2	RAB3B	55.91	FALSE	0.968484	0.618261	0.952614	9690.47	9231.28
Q96E17	Ras-related protein Rab-3C OS=Homo sapiens OX=9606 GN=RAB3C PE=1 SV=1	RAB3C	45.94	FALSE	0.538264	0.457895	1.09596	3208.39	3516.28
P20338	Ras-related protein Rab-4A OS=Homo sapiens OX=9606 GN=RAB4A PE=1 SV=3	RAB4A	41.26	FALSE	0.133058	0.184814	0.717112	2357.85	1690.84
P61018	Ras-related protein Rab-4B OS=Homo sapiens OX=9606 GN=RAB4B PE=1 SV=1	RAB4B	45.22	FALSE	0.00649975	0.0150698	1.55616	29015.7	45153
P20340	Ras-related protein Rab-6A OS=Homo sapiens OX=9606 GN=RAB6A PE=1 SV=3	RAB6A	39.8	FALSE	0.198308	0.241014	1.69101	843.795	1426.86
Q9NRW1	Ras-related protein Rab-6B OS=Homo sapiens OX=9606 GN=RAB6B PE=1 SV=1	RAB6B	41.43	FALSE	0.51049	0.443416	1.0273	476.468	489.475
Q92930;P59190	Ras-related protein Rab-8B OS=Homo sapiens OX=9606 GN=RAB8B PE=1 SV=2	RAB8B	94.9	FALSE	0.165403	0.212814	0.827045	324036	267992
P61224	Ras-related protein Rap-1b OS=Homo sapiens OX=9606 GN=RAP1B PE=1 SV=1	RAP1B	142.34	FALSE	0.104095	0.153799	1.40744	2229.6	3138.04
Q14498	RNA-binding protein 39 OS=Homo sapiens OX=9606 GN=RBM39 PE=1 SV=2	RBM39	283.31	FALSE	0.711141	0.545402	1.05763	9670.93	10228.3
P38159	RNA-binding motif protein, X chromosome OS=Homo sapiens OX=9606 GN=RBMX PE=1 SV=3	RBMX	116.08	FALSE	0.749954	0.556753	0.97738	219600	214633
Q96E39	RNA binding motif protein, X-linked-like-1 OS=Homo sapiens OX=9606 GN=RBMXL1 PE=1 SV=1	RBMXL1	87.21	FALSE	0.898316	0.600352	1.02482	2468.6	2529.88
O75526	RNA-binding motif protein, X-linked-like-2 OS=Homo sapiens OX=9606 GN=RBMXL2 PE=1 SV=3	RBMXL2	112.64	FALSE	0.0510394	0.0879064	0.673632	7120.74	4796.76
Q8N7X1	RNA-binding motif protein, X-linked-like-3 OS=Homo sapiens OX=9606 GN=RBMXL3 PE=2 SV=2	RBMXL3	104.49	FALSE	0.781817	0.56648	0.970066	211706	205369
Q15293	Reticulocalbin-1 OS=Homo sapiens OX=9606 GN=RCN1 PE=1 SV=1	RCN1	245.95	FALSE	0.167971	0.212814	0.733472	3168.73	2324.18
O15258	Protein RER1 OS=Homo sapiens OX=9606 GN=RER1 PE=1 SV=1	RER1	23.46	FALSE	0.0158824	0.0327882	1.88861	1004.46	1897.03
Q6NUM9	All-trans-retinol 13,14-reductase OS=Homo sapiens OX=9606 GN=RETSAT PE=1 SV=2	RETSAT	43.01	FALSE	0.48052	0.432335	1.13221	154208	174596
Q9Y6N7	Roundabout homolog 1 OS=Homo sapiens OX=9606 GN=ROBO1 PE=1 SV=1	ROBO1	841.69	FALSE	0.487848	0.432473	1.15676	379983	439550
P27635	60S ribosomal protein L10 OS=Homo sapiens OX=9606 GN=RPL10 PE=1 SV=4	RPL10	44.9	FALSE	0.490754	0.433773	1.0852	1322.36	1435.03
P62913	60S ribosomal protein L11 OS=Homo sapiens OX=9606 GN=RPL11 PE=1 SV=2	RPL11	81.27	FALSE	0.486193	0.432473	1.11079	17250.2	19161.4
P26373	60S ribosomal protein L13 OS=Homo sapiens OX=9606 GN=RPL13 PE=1 SV=4	RPL13	83.83	TRUE	7.85071e-06	6.95959e-05	16.0048	317.875	5087.51
Q6NVV1	Putative 60S ribosomal protein L13a protein RPL13AP3 OS=Homo sapiens OX=9606 GN=RPL13AP3 PE=5 SV=1	RPL13AP3	41.27	FALSE	0.00608421	0.0146598	0.561316	7061.62	3963.8
P61313	60S ribosomal protein L15 OS=Homo sapiens OX=9606 GN=RPL15 PE=1 SV=2	RPL15	120.87	FALSE	0.167632	0.212814	1.38897	6130.09	8514.52
Q07020	60S ribosomal protein L18 OS=Homo sapiens OX=9606 GN=RPL18 PE=1 SV=2	RPL18	180.36	FALSE	0.141301	0.191486	1.11182	11661	12964.9
Q02543	60S ribosomal protein L18a OS=Homo sapiens OX=9606 GN=RPL18A PE=1 SV=2	RPL18A	158.85	FALSE	0.000777717	0.00239193	2.02906	7379.92	14974.3
P84098	60S ribosomal protein L19 OS=Homo sapiens OX=9606 GN=RPL19 PE=1 SV=1	RPL19	121.89	FALSE	0.995435	0.625043	1.00197	12953.4	12979
P35268	60S ribosomal protein L22 OS=Homo sapiens OX=9606 GN=RPL22 PE=1 SV=2	RPL22	53.67	FALSE	0.232994	0.2701	1.32765	586.559	778.744
P62829	60S ribosomal protein L23 OS=Homo sapiens OX=9606 GN=RPL23 PE=1 SV=1	RPL23	62.98	FALSE	0.048769	0.0849672	2.87141	1806.57	5187.39
P62750	60S ribosomal protein L23a OS=Homo sapiens OX=9606 GN=RPL23A PE=1 SV=1	RPL23A	128.96	FALSE	0.668813	0.52771	2.84691	3489.13	9933.24
P83731	60S ribosomal protein L24 OS=Homo sapiens OX=9606 GN=RPL24 PE=1 SV=1	RPL24	76.14	FALSE	0.246013	0.27668	2.53118	331.429	838.906
P46776	60S ribosomal protein L27a OS=Homo sapiens OX=9606 GN=RPL27A PE=1 SV=2	RPL27A	114.54	FALSE	0.867851	0.591802	1.058	17195.6	18192.9
P47914	60S ribosomal protein L29 OS=Homo sapiens OX=9606 GN=RPL29 PE=1 SV=2	RPL29	82.61	FALSE	0.119199	0.168673	0.804543	65373.8	52596.1
P62888	60S ribosomal protein L30 OS=Homo sapiens OX=9606 GN=RPL30 PE=1 SV=2	RPL30	60.13	FALSE	0.00850418	0.0188472	1.92993	2793.21	5390.7
P62910	60S ribosomal protein L32 OS=Homo sapiens OX=9606 GN=RPL32 PE=1 SV=2	RPL32	29.44	FALSE	0.952172	0.617186	1.02657	672.041	689.895
P49207	60S ribosomal protein L34 OS=Homo sapiens OX=9606 GN=RPL34 PE=1 SV=3	RPL34	86.55	FALSE	0.0381601	0.0697074	1.60779	2163.37	3478.25
P42766	60S ribosomal protein L35 OS=Homo sapiens OX=9606 GN=RPL35 PE=1 SV=2	RPL35	31.57	FALSE	0.557036	0.467673	0.895294	2147.32	1922.48
P18077	60S ribosomal protein L35a OS=Homo sapiens OX=9606 GN=RPL35A PE=1 SV=2	RPL35A	27.17	FALSE	0.413877	0.398548	0.842365	578.777	487.541
P83881	60S ribosomal protein L36a OS=Homo sapiens OX=9606 GN=RPL36A PE=1 SV=2	RPL36A	34.96	FALSE	0.243715	0.27668	1.39385	435.093	606.454
P61513	60S ribosomal protein L37a OS=Homo sapiens OX=9606 GN=RPL37A PE=1 SV=2	RPL37A	83.27	FALSE	0.10491	0.154247	0.759533	24868.9	18888.7
Q59GN2	Putative 60S ribosomal protein L39-like 5 OS=Homo sapiens OX=9606 GN=RPL39P5 PE=5 SV=2	RPL39P5	28.28	FALSE	0.452515	0.418534	0.853022	2096.6	1788.45
P36578	60S ribosomal protein L4 OS=Homo sapiens OX=9606 GN=RPL4 PE=1 SV=5	RPL4	123.8	FALSE	0.997473	0.625043	1.04639	25366.4	26543.3
Q02878	60S ribosomal protein L6 OS=Homo sapiens OX=9606 GN=RPL6 PE=1 SV=3	RPL6	99.71	FALSE	0.782511	0.56648	1.05957	3111.03	3296.34
P62424	60S ribosomal protein L7a OS=Homo sapiens OX=9606 GN=RPL7A PE=1 SV=2	RPL7A	120.45	FALSE	0.189411	0.23302	1.44492	1208.96	1746.85
P04843	Dolichyl-diphosphooligosaccharide--protein glycosyltransferase subunit 1 OS=Homo sapiens OX=9606 GN=RPN1 PE=1 SV=1	RPN1	23.68	FALSE	0.456011	0.418534	0.365154	9498.7	3468.49
P62266	40S ribosomal protein S23 OS=Homo sapiens OX=9606 GN=RPS23 PE=1 SV=3	RPS23	94.33	FALSE	0.00411684	0.0106055	1.44778	1025.7	1484.99
P62979	Ubiquitin-40S ribosomal protein S27a OS=Homo sapiens OX=9606 GN=RPS27A PE=1 SV=2	RPS27A	141.01	FALSE	0.987086	0.621927	1.04359	1169.67	1220.66
P46782	40S ribosomal protein S5 OS=Homo sapiens OX=9606 GN=RPS5 PE=1 SV=4	RPS5	41.88	FALSE	0.0697154	0.112367	2.0329	203.231	413.149
Q96S38	Ribosomal protein S6 kinase delta-1 OS=Homo sapiens OX=9606 GN=RPS6KC1 PE=1 SV=2	RPS6KC1	46.95	FALSE	0.208987	0.249961	0.809817	25473.4	20628.8
P62241	40S ribosomal protein S8 OS=Homo sapiens OX=9606 GN=RPS8 PE=1 SV=2	RPS8	184.11	FALSE	0.00275198	0.00747267	1.18901	34328.4	40816.8
P05109	Protein S100-A8 OS=Homo sapiens OX=9606 GN=S100A8 PE=1 SV=1	S100A8	37.33	FALSE	0.107513	0.157307	0.863438	8699.77	7511.71
Q14151	Scaffold attachment factor B2 OS=Homo sapiens OX=9606 GN=SAFB2 PE=1 SV=1	SAFB2	60.28	FALSE	0.907804	0.604015	1.01822	48837.1	49726.8
O14828	Secretory carrier-associated membrane protein 3 OS=Homo sapiens OX=9606 GN=SCAMP3 PE=1 SV=3	SCAMP3	72.37	TRUE	0.000217762	0.00081031	68.6175	30.8712	2118.3
Q969E2	Secretory carrier-associated membrane protein 4 OS=Homo sapiens OX=9606 GN=SCAMP4 PE=1 SV=1	SCAMP4	52.46	TRUE	5.67811e-05	0.000302562	5.90161	724.959	4278.43
P31431	Syndecan-4 OS=Homo sapiens OX=9606 GN=SDC4 PE=1 SV=2	SDC4	316.13	FALSE	0.0150263	0.0312347	90.1626	21.2245	1913.65
P21912	Succinate dehydrogenase [ubiquinone] iron-sulfur subunit, mitochondrial OS=Homo sapiens OX=9606 GN=SDHB PE=1 SV=3	SDHB	167.79	FALSE	0.973626	0.618261	1.00569	46464.6	46729.1
Q7Z5N4	Protein sidekick-1 OS=Homo sapiens OX=9606 GN=SDK1 PE=2 SV=3	SDK1	130.29	FALSE	0.877619	0.594271	0.990857	224550	222497
Q58EX2	Protein sidekick-2 OS=Homo sapiens OX=9606 GN=SDK2 PE=1 SV=3	SDK2	1041.85	TRUE	7.93317e-07	1.59408e-05	43.5229	4418.88	192322
Q9C0D9	Ethanolaminephosphotransferase 1 OS=Homo sapiens OX=9606 GN=SELENOI PE=1 SV=3	SELENOI	53.23	FALSE	0.155971	0.20351	1.19382	4201.11	5015.37
Q9C0C4	Semaphorin-4C OS=Homo sapiens OX=9606 GN=SEMA4C PE=1 SV=2	SEMA4C	557.79	FALSE	0.928526	0.607081	1.01075	3.41859e+06	3.45536e+06
Q8NC51	Plasminogen activator inhibitor 1 RNA-binding protein OS=Homo sapiens OX=9606 GN=SERBP1 PE=1 SV=2	SERBP1	55.84	FALSE	0.269851	0.295763	0.898756	105522	94838.9
Q9BQI5	SH3-containing GRB2-like protein 3-interacting protein 1 OS=Homo sapiens OX=9606 GN=SGIP1 PE=1 SV=2	SGIP1	48.8	FALSE	0.280355	0.302331	0.80204	3.08006e+06	2.47033e+06
Q6ZV89	SH2 domain-containing protein 5 OS=Homo sapiens OX=9606 GN=SH2D5 PE=1 SV=2	SH2D5	38.49	FALSE	0.114001	0.164405	1.76671	1435.41	2535.95
Q6IA17	Single Ig IL-1-related receptor OS=Homo sapiens OX=9606 GN=SIGIRR PE=1 SV=3	SIGIRR	356.09	TRUE	0.000113426	0.00048839	8.85083	3177.98	28127.7
P53985	Monocarboxylate transporter 1 OS=Homo sapiens OX=9606 GN=SLC16A1 PE=1 SV=3	SLC16A1	176.35	FALSE	0.00621725	0.0146598	2.66146	22748.5	60544.3
O15427	Monocarboxylate transporter 4 OS=Homo sapiens OX=9606 GN=SLC16A3 PE=1 SV=1	SLC16A3	265.76	FALSE	7.92058e-05	0.000382801	4.90675	14346.4	70394.1
O15374	Monocarboxylate transporter 5 OS=Homo sapiens OX=9606 GN=SLC16A4 PE=2 SV=1	SLC16A4	98.99	TRUE	0.000118193	0.000501749	49.9605	72.3549	3614.88
P43003	Excitatory amino acid transporter 1 OS=Homo sapiens OX=9606 GN=SLC1A3 PE=1 SV=1	SLC1A3	141	TRUE	1.19137e-07	5.9848e-06	10	0	2145.22
Q15758	Neutral amino acid transporter B(0) OS=Homo sapiens OX=9606 GN=SLC1A5 PE=1 SV=2	SLC1A5	220.18	TRUE	1.54671e-05	0.000113705	35.3208	234.713	8290.26
Q02978	Mitochondrial 2-oxoglutarate/malate carrier protein OS=Homo sapiens OX=9606 GN=SLC25A11 PE=1 SV=3	SLC25A11	53.05	FALSE	0.727487	0.550671	1.09748	1347.01	1478.31
Q9UJS0	Calcium-binding mitochondrial carrier protein Aralar2 OS=Homo sapiens OX=9606 GN=SLC25A13 PE=1 SV=2	SLC25A13	28.6	FALSE	0.885125	0.595408	0.977339	33746.8	32982.1
Q00325	Phosphate carrier protein, mitochondrial OS=Homo sapiens OX=9606 GN=SLC25A3 PE=1 SV=2	SLC25A3	54.22	FALSE	0.245861	0.27668	1.15813	8203.49	9500.7
P05141	ADP/ATP translocase 2 OS=Homo sapiens OX=9606 GN=SLC25A5 PE=1 SV=7	SLC25A5	256.11	FALSE	0.0604171	0.100609	1.26206	5189.98	6550.07
Q9HAS3	Solute carrier family 28 member 3 OS=Homo sapiens OX=9606 GN=SLC28A3 PE=1 SV=1	SLC28A3	71.78	FALSE	0.886967	0.595408	0.943745	3710.8	3502.05
Q99808	Equilibrative nucleoside transporter 1 OS=Homo sapiens OX=9606 GN=SLC29A1 PE=1 SV=3	SLC29A1	221.59	FALSE	0.000380137	0.00128562	3.97468	1110.24	4412.84
P11166	Solute carrier family 2, facilitated glucose transporter member 1 OS=Homo sapiens OX=9606 GN=SLC2A1 PE=1 SV=2	SLC2A1	168.24	TRUE	1.00268e-06	1.88884e-05	5.92517	7471.64	44270.7
P11169	Solute carrier family 2, facilitated glucose transporter member 3 OS=Homo sapiens OX=9606 GN=SLC2A3 PE=1 SV=1	SLC2A3	258.05	TRUE	2.55891e-05	0.000154255	6.57898	6758.52	44464.1
Q9Y6M5	Zinc transporter 1 OS=Homo sapiens OX=9606 GN=SLC30A1 PE=1 SV=3	SLC30A1	41.71	FALSE	0.804405	0.56648	1.06799	3.35315e+06	3.58113e+06
O15431	High affinity copper uptake protein 1 OS=Homo sapiens OX=9606 GN=SLC31A1 PE=1 SV=1	SLC31A1	51.32	TRUE	0.000137275	0.000551678	13.4093	548.854	7359.76
Q8IXU6	Solute carrier family 35 member F2 OS=Homo sapiens OX=9606 GN=SLC35F2 PE=1 SV=1	SLC35F2	41.64	TRUE	0.00259092	0.00709929	37.2041	33.5823	1249.4
Q96QD8	Sodium-coupled neutral amino acid transporter 2 OS=Homo sapiens OX=9606 GN=SLC38A2 PE=1 SV=2	SLC38A2	188.7	FALSE	0.774827	0.565468	1.07788	257154	277180
P08195	4F2 cell-surface antigen heavy chain OS=Homo sapiens OX=9606 GN=SLC3A2 PE=1 SV=3	SLC3A2	424.83	FALSE	0.000388826	0.00128786	3.95268	15641.1	61824.1
Q8IWA5	Choline transporter-like protein 2 OS=Homo sapiens OX=9606 GN=SLC44A2 PE=1 SV=3	SLC44A2	833.32	TRUE	9.52708e-06	7.97647e-05	19.5937	5048.27	98914.4
Q9Y289	Sodium-dependent multivitamin transporter OS=Homo sapiens OX=9606 GN=SLC5A6 PE=2 SV=2	SLC5A6	316.19	TRUE	2.87612e-06	3.61201e-05	42.6123	1324.6	56444.5
P52569	Cationic amino acid transporter 2 OS=Homo sapiens OX=9606 GN=SLC7A2 PE=1 SV=2	SLC7A2	234.72	TRUE	3.66128e-05	0.000212218	5.01627	3432.73	17219.5
Q01650	Large neutral amino acids transporter small subunit 1 OS=Homo sapiens OX=9606 GN=SLC7A5 PE=1 SV=2	SLC7A5	314.31	TRUE	1.97817e-05	0.000129616	10.3508	5620.94	58181
Q92485	Acid sphingomyelinase-like phosphodiesterase 3b OS=Homo sapiens OX=9606 GN=SMPDL3B PE=1 SV=2	SMPDL3B	159.11	TRUE	1.76856e-05	0.00012158	10.4012	2608.75	27134.2
Q9UNH7	Sorting nexin-6 OS=Homo sapiens OX=9606 GN=SNX6 PE=1 SV=1	SNX6	35.91	FALSE	0.20373	0.245622	0.886149	151952	134652
Q99523	Sortilin OS=Homo sapiens OX=9606 GN=SORT1 PE=1 SV=3	SORT1	843.66	TRUE	1.77484e-05	0.00012158	38.1328	4234.45	161471
O43278	Kunitz-type protease inhibitor 1 OS=Homo sapiens OX=9606 GN=SPINT1 PE=1 SV=2	SPINT1	788.98	FALSE	0.763326	0.56087	1.02735	153713	157917
P35325	Small proline-rich protein 2B OS=Homo sapiens OX=9606 GN=SPRR2B PE=2 SV=1	SPRR2B	28.46	FALSE	0.913594	0.605449	0.440292	1743.29	767.557
Q8N9Q2	Protein SREK1IP1 OS=Homo sapiens OX=9606 GN=SREK1IP1 PE=1 SV=1	SREK1IP1	44.69	FALSE	0.274678	0.299566	1.09479	77216.1	84535.5
Q9UQ35	Serine/arginine repetitive matrix protein 2 OS=Homo sapiens OX=9606 GN=SRRM2 PE=1 SV=2	SRRM2	120.99	FALSE	0.0427599	0.076715	0.640368	112492	72036.6
Q01130	Serine/arginine-rich splicing factor 2 OS=Homo sapiens OX=9606 GN=SRSF2 PE=1 SV=4	SRSF2	42.84	FALSE	0.390054	0.381704	0.863591	225112	194404
P84103	Serine/arginine-rich splicing factor 3 OS=Homo sapiens OX=9606 GN=SRSF3 PE=1 SV=1	SRSF3	107.5	FALSE	0.275308	0.299566	2.1552	1838.88	3963.16
Q13247	Serine/arginine-rich splicing factor 6 OS=Homo sapiens OX=9606 GN=SRSF6 PE=1 SV=2	SRSF6	78.32	FALSE	0.853549	0.586798	1.07129	56397.8	60418.4
Q16629	Serine/arginine-rich splicing factor 7 OS=Homo sapiens OX=9606 GN=SRSF7 PE=1 SV=1	SRSF7	220.69	FALSE	0.175464	0.220359	1.42039	17310.3	24587.4
Q9BRL6	Serine/arginine-rich splicing factor 8 OS=Homo sapiens OX=9606 GN=SRSF8 PE=1 SV=1	SRSF8	50.55	FALSE	0.177784	0.220516	0.900786	5288.96	4764.23
Q04837	Single-stranded DNA-binding protein, mitochondrial OS=Homo sapiens OX=9606 GN=SSBP1 PE=1 SV=1	SSBP1	828.04	FALSE	0.00310004	0.00819628	0.389025	198676	77289.8
P51571	Translocon-associated protein subunit delta OS=Homo sapiens OX=9606 GN=SSR4 PE=1 SV=1	SSR4	27.67	FALSE	0.486329	0.432473	0.947211	31674.1	30002
Q13586	Stromal interaction molecule 1 OS=Homo sapiens OX=9606 GN=STIM1 PE=1 SV=3	STIM1	50.52	FALSE	0.843549	0.585601	1.14541	8757.99	10031.5
Q8TCJ2	Dolichyl-diphosphooligosaccharide--protein glycosyltransferase subunit STT3B OS=Homo sapiens OX=9606 GN=STT3B PE=1 SV=1	STT3B	39.2	FALSE	0.88133	0.594271	0.934112	8848.46	8265.45
Q9P2R7	Succinate--CoA ligase [ADP-forming] subunit beta, mitochondrial OS=Homo sapiens OX=9606 GN=SUCLA2 PE=1 SV=3	SUCLA	40.52	FALSE	0.333451	0.336495	2.08586	300.034	625.827
P53597	Succinate--CoA ligase [ADP/GDP-forming] subunit alpha, mitochondrial OS=Homo sapiens OX=9606 GN=SUCLG1 PE=1 SV=4	SUCLG1	36.37	FALSE	0.081665	0.128443	1.52707	971.273	1483.21
O60506	Heterogeneous nuclear ribonucleoprotein Q OS=Homo sapiens OX=9606 GN=SYNCRIP PE=1 SV=2	SYNCRIP	54.06	FALSE	0.764804	0.56087	1.43849	1398.08	2011.13
Q92804	TATA-binding protein-associated factor 2N OS=Homo sapiens OX=9606 GN=TAF15 PE=1 SV=1	TAF15	61.47	FALSE	0.6338	0.509418	0.790995	3958.54	3131.19
P24557	Thromboxane-A synthase OS=Homo sapiens OX=9606 GN=TBXAS1 PE=1 SV=3	TBXAS1	28.21	FALSE	0.988374	0.621927	1.01076	12683.3	12819.8
Q13428	Treacle protein OS=Homo sapiens OX=9606 GN=TCOF1 PE=1 SV=3	TCOF1	79.39	FALSE	0.126925	0.177936	0.87882	300615	264187
O60522	Tudor domain-containing protein 6 OS=Homo sapiens OX=9606 GN=TDRD6 PE=2 SV=2	TDRD6	67.46	FALSE	0.225423	0.263349	1.3198	154847	204367
Q9NZ01	Very-long-chain enoyl-CoA reductase OS=Homo sapiens OX=9606 GN=TECR PE=1 SV=1	TECR	64.39	FALSE	0.26584	0.293502	1.27609	776.43	990.797
P02786	Transferrin receptor protein 1 OS=Homo sapiens OX=9606 GN=TFRC PE=1 SV=2	TFRC	5185.28	TRUE	3.33452e-06	4.02019e-05	32.7731	91861.6	3.01059e+06
Q99805	Transmembrane 9 superfamily member 2 OS=Homo sapiens OX=9606 GN=TM9SF2 PE=1 SV=1	TM9SF2	101.15	FALSE	0.514056	0.443955	1.1325	67012.5	75891.6
Q9BVK6	Transmembrane emp24 domain-containing protein 9 OS=Homo sapiens OX=9606 GN=TMED9 PE=1 SV=2	TMED9	79.3	FALSE	0.925672	0.606531	0.850939	4439.22	3777.5
Q6P9G4	Transmembrane protein 154 OS=Homo sapiens OX=9606 GN=TMEM154 PE=1 SV=2	TMEM154	44.59	TRUE	4.95595e-11	1.49376e-08	10	0	4423.53
Q9HC07	Transmembrane protein 165 OS=Homo sapiens OX=9606 GN=TMEM165 PE=1 SV=1	TMEM165	39.51	FALSE	0.0189807	0.0376376	1.60503	2283.61	3665.27
Q9NV96	Cell cycle control protein 50A OS=Homo sapiens OX=9606 GN=TMEM30A PE=1 SV=1	TMEM30A	435.62	TRUE	9.42989e-06	7.97647e-05	28.4199	1877.2	53349.8
O15393	Transmembrane protease serine 2 OS=Homo sapiens OX=9606 GN=TMPRSS2 PE=1 SV=3	TMPRSS2	27.6	TRUE	1.45306e-06	2.30507e-05	83469.3	0.0310841	2594.57
Q13641	Trophoblast glycoprotein OS=Homo sapiens OX=9606 GN=TPBG PE=1 SV=1	TPBG	74.78	TRUE	0.00293013	0.00788538	11.589	423.146	4903.83
P62995	Transformer-2 protein homolog beta OS=Homo sapiens OX=9606 GN=TRA2B PE=1 SV=1	TRA2B	88.51	FALSE	0.422514	0.401256	1.16858	23522.8	27488.1
Q12931	Heat shock protein 75 kDa, mitochondrial OS=Homo sapiens OX=9606 GN=TRAP1 PE=1 SV=3	TRAP1	617.31	FALSE	0.191575	0.234724	0.792264	107584	85234.7
Q13263	Transcription intermediary factor 1-beta OS=Homo sapiens OX=9606 GN=TRIM28 PE=1 SV=5	TRIM28	90.38	FALSE	0.0495578	0.0858452	1.46392	3603.89	5275.81
Q5BVD1	TPA-induced transmembrane protein OS=Homo sapiens OX=9606 GN=TTMP PE=1 SV=2	TTMP	46.32	TRUE	0.00744462	0.016999	5.27574	1627.34	8585.43
Q9BQE3	Tubulin alpha-1C chain OS=Homo sapiens OX=9606 GN=TUBA1C PE=1 SV=1	TUBA1C	224.88	FALSE	0.00024212	0.00088996	1.40415	8128.01	11412.9
Q9NY65	Tubulin alpha-8 chain OS=Homo sapiens OX=9606 GN=TUBA8 PE=1 SV=1	TUBA8	86.78	FALSE	0.269336	0.295763	0.734748	7044.84	5176.18
Q13509	Tubulin beta-3 chain OS=Homo sapiens OX=9606 GN=TUBB3 PE=1 SV=2	TUBB3	37.93	FALSE	0.245339	0.27668	0.281228	7323.69	2059.63
P04350	Tubulin beta-4A chain OS=Homo sapiens OX=9606 GN=TUBB4A PE=1 SV=2	TUBB4A	44.7	FALSE	0.309946	0.324375	0.892	6597.81	5885.24
P49411	Elongation factor Tu, mitochondrial OS=Homo sapiens OX=9606 GN=TUFM PE=1 SV=2	TUFM	1084.78	FALSE	0.0170187	0.0344265	0.798878	115364	92161.5
P0DN76	Splicing factor U2AF 35 kDa subunit-like protein OS=Homo sapiens OX=9606 GN=U2AF1L5 PE=1 SV=1	U2AF1L5	42.59	FALSE	0.0119633	0.0253932	2.73053	389.133	1062.54
P62987	Ubiquitin-60S ribosomal protein L40 OS=Homo sapiens OX=9606 GN=UBA52 PE=1 SV=2	UBA52	118.02	FALSE	0.207172	0.248778	0.897371	7412.72	6651.96
O75385	Serine/threonine-protein kinase ULK1 OS=Homo sapiens OX=9606 GN=ULK1 PE=1 SV=2	ULK1	61.97	FALSE	0.874652	0.593753	0.717172	448.828	321.887
Q9UDW1	Cytochrome b-c1 complex subunit 9 OS=Homo sapiens OX=9606 GN=UQCR10 PE=1 SV=3	UQCR10	25.89	FALSE	0.548067	0.462721	0.900039	2181.31	1963.27
P31930	Cytochrome b-c1 complex subunit 1, mitochondrial OS=Homo sapiens OX=9606 GN=UQCRC1 PE=1 SV=3	UQCRC1	144.86	FALSE	0.501851	0.439713	0.877713	31159.8	27349.4
P22695	Cytochrome b-c1 complex subunit 2, mitochondrial OS=Homo sapiens OX=9606 GN=UQCRC2 PE=1 SV=3	UQCRC2	120.96	FALSE	0.0146089	0.030578	1.2882	3680.03	4740.6
P45880	Voltage-dependent anion-selective channel protein 2 OS=Homo sapiens OX=9606 GN=VDAC2 PE=1 SV=2	VDAC2	58.64	FALSE	0.325011	0.334337	2.11647	2262.92	4789.41
P98155	Very low-density lipoprotein receptor OS=Homo sapiens OX=9606 GN=VLDLR PE=1 SV=1	VLDLR	218.11	TRUE	0.000108028	0.000471892	69.9513	255.698	17886.4
Q9H7M9	V-type immunoglobulin domain-containing suppressor of T-cell activation OS=Homo sapiens OX=9606 GN=VSIR PE=1 SV=3	VSIR	60.62	FALSE	0.732173	0.550671	1.07927	1.41951e+06	1.53203e+06
P04004	Vitronectin OS=Homo sapiens OX=9606 GN=VTN PE=1 SV=1	VTN	42.53	FALSE	0.0162551	0.0333292	4.45695	298.264	1329.35
A3KMH1	von Willebrand factor A domain-containing protein 8 OS=Homo sapiens OX=9606 GN=VWA8 PE=1 SV=2	VWA8	101.77	FALSE	0.128754	0.179664	0.810868	7645.13	6199.19
Q5T750	Skin-specific protein 32 OS=Homo sapiens OX=9606 GN=XP32 PE=1 SV=1	XP32	50.85	FALSE	0.554533	0.466872	0.313503	793.106	248.641
P07947	Tyrosine-protein kinase Yes OS=Homo sapiens OX=9606 GN=YES1 PE=1 SV=3	YES1	69.17	FALSE	0.249725	0.27981	0.673915	58940.3	39720.8

## Sheet: Table 2
Suppementary Table 2. mRNA expression levels of the 89 genes in cancer cell lines.
		Intracellular localization scored by COMPARTMENTS	mRNA expression level in TPM (Referred from The Cancer Cell Line Encyclopedia)
		Confidence score (0 to 5, with 5 being the highest)	Adhesion cell lines							Suspension cell lines											CRISPR/Cas9 mini Library
Gene ID	Gene Name	Plasma Membrane	A549, lung adenocarcinoma	Detroit 562, pharyngeal squamous cell carcinoma	FaDu, hypopharyngeal squamous cell carcinoma	HeLa, cervical adenocarcinoma	Hep G2, hepatoblastoma	HuH-7, hepatocellular carcinoma	NCI-H358, bronchoalveolar adenocarcinoma	JURKAT, childhood T acute lymphoblastic leukemia	Raji, Epstein-Barr virus-related Burkitt lymphoma	Daudi, Burkitts lymphoma	A4/Fuk, B-cell acute lymphoblastic leukemia	MOLT-3, adult T acute lymphoblastic leukemia	THP-1, childhood acute monocytic leukemia	U-937, adult acute monocytic leukemia	HEL, erythroleukemia	HL-60, adult acute myeloid leukemia	KMS-11, multiple myeloma	RPMI 8226, multiple myeloma	Yes/No
ENSG00000118777	ABCG2	5	89	1	0.6	0.3	11	8	8	2	0	0.3	4	0.2	0.1	0	0.4	0	19	31	No
ENSG00000163286	ALPG	5	0.2	0.1	2	0	0.1	0.1	0.4	0.1	0	0	2	0	0	0	0	0	0	0	No
ENSG00000163295	ALPI	5	0	0	0	2	0	0.1	0	0	0.1	0.3	0	0	0	0	0	0	0	0	No
ENSG00000084234	APLP2	5	164	184	663	174	484	484	570	71	59	131	73	25	1030	403	118	92	185	93	No
ENSG00000118137	APOA1	5	0.3	0	0.2	0.2	4211	1528	0	0	0	0.1	0.3	0.2	1	0	0.8	0.1	0.2	0	No
ENSG00000143153	ATP1B1	5	393	245	60	341	203	291	334	17	7	0.5	3	6	16	5	5	1	5	4	No
ENSG00000074410	CA12	4	153	0.2	0.2	26	0.4	27	0.1	0.2	0.1	0	0.1	0.1	0.5	0	0.1	0.1	0	0.2	No
ENSG00000103855	CD276	5	18	36	39	53	37	93	146	0.1	0.3	0.1	0.7	0.2	46	12	1	0.6	16	1	Yes
ENSG00000117335	CD46	5	106	88	148	100	88	103	119	92	35	36	60	88	90	87	71	36	129	57	No
ENSG00000196352	CD55	5	40	50	12	454	11	6	56	9	20	37	40	4	15	33	68	10	60	19	No
ENSG00000116815	CD58	5	31	17	47	70	10	12	44	9	46	8	53	48	27	31	33	10	25	4	No
ENSG00000110651	CD81	5	84	32	63	54	0.2	57	57	100	126	105	62	43	143	0.8	35	45	8	27	Yes
ENSG00000102181	CD99L2	4	46	9	5	27	11	15	14	36	14	14	40	21	57	73	16	9	53	20	No
ENSG00000039068	CDH1	5	12	89	271	0.4	15	37	290	0.3	0.4	0.4	2	0.4	0.3	0.2	0.3	0.1	0.7	8	Yes
ENSG00000179776	CDH5	5	0.1	2	5	0.1	0.4	0.6	0.2	0	0	0	0	0	0	0	4	0.1	0	0	Yes
ENSG00000189143	CLDN4	5	3	42	90	18	35	1	198	2	0.5	1	99	0.7	0.3	2	0.3	0.2	1	8	Yes
ENSG00000080822	CLDND1	4	36	39	42	19	17	27	40	49	25	37	31	39	24	38	48	17	87	22	No
ENSG00000198223	CSF2RA	5	4	2	4	5	0	0	1	0.1	0	0.3	0.1	0.8	15	17	0	5	0	0.2	No
ENSG00000173402	DAG1	5	102	73	144	164	100	168	75	20	27	13	34	10	35	24	6	5	19	25	No
ENSG00000134755	DSC2	5	2	5	24	4	11	9	52	0	0	0	0.1	0	0	0	11	0.5	0	0	Yes
ENSG00000046604	DSG2	5	113	139	294	93	69	56	160	86	0.3	0.4	0.9	3	26	0.1	0.2	0.8	152	101	Yes
ENSG00000117298	ECE1	5	65	23	38	147	42	99	98	44	44	33	111	17	10	25	65	2	39	39	No
ENSG00000164176	EDIL3	3	0.1	25	2	260	0	2	54	0	0.3	0.1	0.4	0.1	0.2	0	0.3	2	0.1	2	No
ENSG00000136160	EDNRB	5	0	0.3	0	0	0	0.3	0	0.1	0.1	0	5	0	2	0	0	0	0.3	0	No
ENSG00000233056	ERVH48-1	no data	0.1	0	0.8	0	0.2	0.5	0.3	2	0.1	0.3	0.5	10	0.2	0.6	2	0.1	0.2	0.5	No
ENSG00000158769	F11R	5	18	60	76	7	28	35	74	34	9	8	18	24	16	29	28	22	14	30	Yes
ENSG00000110195	FOLR1	5	0.5	2	4	352	0.1	2	1	0	0.1	0	2	0.1	0	0.1	0.5	0.1	0.1	0.6	Yes
ENSG00000090339	ICAM1	5	2	9	19	3	81	61	9	10	71	39	1	5	1	43	26	0.3	17	114	No
ENSG00000160223	ICOSLG	5	0	0	0.1	0	0	0.2	0	0	0.9	2	0.1	0	0.4	0.3	0.1	0.3	0.2	0.3	No
ENSG00000143061	IGSF3	3	30	4	25	51	2	28	13	9	0.1	0.1	0	1	4	6	23	0.2	9	0.1	Yes
ENSG00000162729	IGSF8	4	13	16	20	19	64	30	49	81	49	57	129	59	39	38	25	2	166	31	No
ENSG00000213949	ITGA1	5	2	1	0.2	9	8	32	2	0.9	0	0	0	8	0.6	0	0.1	0.1	0.1	0	Yes
ENSG00000005884	ITGA3	5	135	175	134	84	0.5	3	198	12	0.4	0.4	8	2	2	5	0.4	3	2	8	No
ENSG00000161638	ITGA5	5	36	9	12	106	0.1	65	3	19	0.2	0.4	4	24	144	151	71	30	0.3	1	Yes
ENSG00000091409	ITGA6	5	71	253	61	75	69	72	171	53	16	2	1	21	4	125	2	24	20	1	Yes
ENSG00000138448	ITGAV	5	316	77	64	180	72	290	83	18	7	0.3	16	2	23	8	25	3	34	14	Yes
ENSG00000150093	ITGB1	5	1226	261	188	584	164	334	211	69	53	178	91	80	62	115	157	11	187	26	Yes
ENSG00000082781	ITGB5	5	190	40	9	100	79	85	74	0.6	0.5	0.5	29	0.2	8	3	43	0.7	226	58	Yes
ENSG00000135480	KRT7	2	1896	28	30	1435	0.3	1	716	0.5	0.7	0.8	7	1	1	0.7	0.7	0.6	3	31	No
ENSG00000170484	KRT74	1	0	0	1	0	0	0	0	0	0	0	0.1	0	0	0	0	0	0	0	No
ENSG00000113594	LIFR	5	9	17	7	12	9	32	18	3	0	0	0	0.1	0	0	0	0	0.4	0.1	Yes
ENSG00000123384	LRP1	5	9	4	16	23	107	208	10	5	0.2	0.9	12	1	4	0.1	0.4	0.6	8	1	Yes
ENSG00000081479	LRP2	5	0	0	0.3	0	0	2	0.3	2	0	0.1	0.1	0	0.1	0	0.8	0	0.1	0	Yes
ENSG00000070018	LRP6	5	57	11	37	13	22	41	16	26	0.1	0.1	0.3	20	4	0.1	21	0.4	20	10	Yes
ENSG00000124466	LYPD3	5	0.2	7	35	4	1	0.6	16	5	0.1	0.3	0.7	3	0.2	1	0.4	0	0.4	0.1	No
ENSG00000003056	M6PR	4	140	97	220	111	59	89	64	105	157	109	245	91	122	152	204	56	121	100	No
ENSG00000153208	MERTK	5	5	3	2	0.1	37	20	13	9	0.6	0.2	2	0.3	3	24	13	0.3	2	11	Yes
ENSG00000140545	MFGE8	4	105	6	7	8	5	25	29	77	3	0.2	46	92	3	19	76	0.7	25	10	No
ENSG00000102996	MMP15	5	11	19	42	8	91	71	13	39	0.2	0.1	11	1	14	6	2	3	3	16	No
ENSG00000179820	MYADM	5	184	19	27	108	88	62	104	27	6	0.4	45	33	105	120	45	66	0.2	26	No
ENSG00000149294	NCAM1	5	0.1	0	0.2	0	0	0	0.1	0.5	0.1	0.2	3	0.1	0.4	1	0.4	0.2	1	31	No
ENSG00000110400	NECTIN1	5	4	35	151	4	12	13	15	19	20	6	8	0.2	8	24	4	61	23	30	No
ENSG00000143217	NECTIN4	5	2	7	52	1	10	0.2	30	0	0.1	0	0.2	0.1	0.8	0	0.3	0.1	0.2	0.1	Yes
ENSG00000156642	NPTN	5	186	95	137	124	66	181	221	36	41	44	44	40	63	59	30	35	73	49	No
ENSG00000197822	OCLN	5	5	7	7	0.1	9	7	5	3	0	0.2	0.1	0.3	2	2	1	0.1	0.5	2	Yes
ENSG00000112378	PERP	5	157	160	653	256	95	118	112	21	0.7	0.7	71	0.6	37	1	1	0.9	43	0.6	No
ENSG00000076356	PLXNA2	5	1	24	21	8	2	8	0.1	0.1	0.1	0	0.4	0.2	0.1	0	0	0.1	19	7	Yes
ENSG00000164050	PLXNB1	5	4	9	34	23	63	66	18	22	0.2	0.2	4	15	5	8	0.5	0.5	6	2	No
ENSG00000196576	PLXNB2	5	59	91	84	192	117	121	130	2	34	115	45	0.6	275	1	15	7	25	46	Yes
ENSG00000171867	PRNP	5	316	119	202	54	193	5	200	73	34	26	64	86	31	172	2	26	41	33	No
ENSG00000052344	PRSS8	5	0.2	34	47	0.6	4	0.2	27	0.2	0.1	0.1	0.3	0.3	0.4	0.2	0.2	0.2	0.2	0.3	Yes
ENSG00000142949	PTPRF	5	95	35	197	81	136	230	107	39	0.3	0.2	16	4	156	6	3	0.7	51	2	Yes
ENSG00000149177	PTPRJ	5	66	10	7	46	1	5	36	2	6	19	7	0.4	48	12	0.8	9	5	2	No
ENSG00000073008	PVR	5	204	60	79	113	62	251	171	28	0.3	0.5	0.8	11	70	53	54	23	0.4	13	No
ENSG00000167526	RPL13	1	176	380	364	350	648	500	611	1103	533	719	711	583	599	648	589	535	169	373	No
ENSG00000116521	SCAMP3	4	99	52	88	110	56	147	84	134	116	56	168	89	161	135	120	84	397	153	No
ENSG00000227500	SCAMP4	4	14	30	40	18	26	47	19	24	16	15	25	18	19	25	14	11	22	15	No
ENSG00000069188	SDK2	5	0.4	0	0.8	0	0	0	0	0.2	0	0	0.3	2	0	0.1	0	5	0	2	Yes
ENSG00000185187	SIGIRR	4	11	9	20	9	2	5	17	44	1	3	60	46	20	26	19	21	2	10	No
ENSG00000168679	SLC16A4	5	95	0.8	7	2	2	2	3	6	3	5	2	4	4	2	3	0.5	1	0.9	No
ENSG00000079215	SLC1A3	5	0.1	253	23	2	0.1	12	0	2	0.6	0.5	3	0	13	29	0.1	1	0.7	0	Yes
ENSG00000105281	SLC1A5	5	272	70	111	164	173	117	129	356	263	143	435	146	230	394	822	180	220	117	No
ENSG00000117394	SLC2A1	5	124	80	380	211	349	50	376	48	90	49	30	18	167	40	102	17	14	74	No
ENSG00000059804	SLC2A3	5	12	2	1	6	155	3	1	11	3	2	2	15	1	24	119	2	4	6	No
ENSG00000136868	SLC31A1	5	61	38	39	47	106	138	43	62	42	19	50	20	26	65	32	12	45	21	No
ENSG00000110660	SLC35F2	3	63	44	52	44	14	0.2	118	57	72	38	120	3	43	21	52	43	71	59	No
ENSG00000129353	SLC44A2	5	7	92	125	62	6	36	68	50	75	178	9	49	2	34	91	1	9	9	No
ENSG00000138074	SLC5A6	5	62	11	25	28	140	64	41	43	73	31	82	26	49	76	88	46	34	35	No
ENSG00000003989	SLC7A2	5	4	2	0.7	31	57	103	0	0	0	0.1	0.1	0	6	0	0	0.2	10	0.6	No
ENSG00000103257	SLC7A5	5	1538	369	808	1386	363	216	665	754	327	121	309	468	136	201	454	81	232	179	No
ENSG00000130768	SMPDL3B	4	3	6	3	0.6	1	19	35	0.1	3	3	4	0.1	1	0.3	25	0.4	0	35	Yes
ENSG00000134243	SORT1	5	13	13	56	32	64	28	57	73	0.6	3	13	34	11	0.6	9	1	81	15	Yes
ENSG00000072274	TFRC	5	220	436	236	176	244	382	301	116	216	57	220	61	116	39	386	177	158	179	Yes
ENSG00000170006	TMEM154	3	0.1	8	6	0.2	0.1	0.4	8	9	4	37	4	9	11	5	6	3	0	0.2	No
ENSG00000112697	TMEM30A	5	247	71	179	89	91	172	172	84	187	94	120	92	469	88	88	61	105	85	No
ENSG00000184012	TMPRSS2	5	0	4	3	0	4	0.3	0.4	0.2	0	0	0.2	0.1	0.1	0	0	0	0.8	4	No
ENSG00000146242	TPBG	4	17	18	29	18	0.4	2	39	2	0	0.1	0.5	0.1	16	2	11	0.2	0.1	2	Yes
ENSG00000114529	TTMP	5	8	12	6	6	0.7	8	10	0.5	11	16	28	0.5	0.2	0	15	0.1	4	0	No
ENSG00000147852	VLDLR	5	21	2	3	6	1	9	14	56	4	0.3	0.8	36	75	23	1	13	1	0.2	Yes

## Sheet: Table 3
Suppementary Table 3. Statistical analysis of rubella virus-resistant JAR cells using CRISPR/Cas9 knockout mini-libraries.
	category (selected based on)	sgRNA			Base vs Passage 1					Base vs Passage 2
gene	LC-MS/Detected protein-related	name	ID	sequence	t_value.Passage1	dof.Passage1	p_value_twosided.Passage1	log2FC.Passage1	fdr_twosided.Passage1	t_value.Passage2	dof.Passage2	p_value_twosided.Passage2	log2FC.Passage2	fdr_twosided.Passage2
ADAM9	Selected protein-related	ADAM9_1	HGLibA_00784	CACTGACCATCCCAATATAC	7.98342	1.42925	0.0370957	0.1631	0.304185	149.328	1.93873	5.8584e-05	1.81554	0.00545858
ADAM9	Selected protein-related	ADAM9_2	HGLibA_00785	TTAGGTATCTTATGTTATTC	4.48	1.99988	0.0463904	0.0270807	0.356456	-9.62614	1.14019	0.0495466	-0.165436	0.406282
CD276	LS-MS	CD276_1	HGLibA_08320	TGCACAGTTTCACCGAAGGC	5.17741	1.13725	0.0997493	0.0938298	0.584246	22.9117	1.16479	0.0172552	0.378696	0.188657
CD276	LS-MS	CD276_2	HGLibA_08321	TTGATGTGCACAGCGTCCTG	-4.42364	1.05635	0.131448	-0.138891	0.634042	8.56875	1.99951	0.0133575	0.0650796	0.156474
CD81	LS-MS	CD81_1	HGLibA_08455	TGATGACGCCAACAACGCCA	-1.70241	1.47542	0.272724	-0.115082	0.683333	7.28951	1.10938	0.0715005	0.206558	0.468806
CD81	LS-MS	CD81_2	HGLibA_08456	GGTGAAGACCTTCCACGAGA	-34.7012	1.96641	0.000914276	-0.377783	0.0275748	-4.88692	1.00522	0.127547	-0.967236	0.49804
CDH1	LS-MS	CDH1_1	HGLibA_08628	CCTCGACACCCGATTCAAAG	0.0534829	1.01389	0.965894	-0.0369978	1	0.143666	1.00725	0.909032	-0.0283214	1
CDH1	LS-MS	CDH1_2	HGLibA_08629	CGCCGAGAGCTACACGTTCA	-1.34608	1.81232	0.322008	-0.0958175	0.683333	-5.1315	1.15198	0.0987051	-0.334666	0.468806
CDH5	LS-MS	CDH5_1	HGLibA_08682	TTCATGACGTGAACGACAAC	1.11447	1.09662	0.452513	0.0296432	0.683333	1.70164	1.07796	0.324643	0.175347	0.645669
CDH5	LS-MS	CDH5_2	HGLibA_08683	AACAACCGATGCGTGAACAC	-8.07421	1.99853	0.0150271	-0.0693931	0.172212	-1.18475	1.00103	0.446138	-0.440119	0.645669
CLDN4	LS-MS	CLDN4_1	HGLibA_09897	GGCACCTTACACGTAGTTGC	-2.40815	1.00845	0.248887	-0.255292	0.683333	-4.9005	1.00583	0.127091	-0.725863	0.49804
CLDN4	LS-MS	CLDN4_2	HGLibA_09898	GGCCCAGCCGACGTAGAGCG	1.62357	1.06511	0.340207	0.0417192	0.683333	-28.6606	1.9893	0.00125086	-0.194297	0.0170951
DSC2	LS-MS	DSC2_1	HGLibA_13991	TCATACTGCTCACGATCTAC	-11.0482	1.99706	0.00813517	-0.101044	0.121288	-0.36481	1.00044	0.777285	-0.276044	0.937314
DSC2	LS-MS	DSC2_2	HGLibA_13992	GTCAACTCCAGGACCTCTTA	-0.268034	1.00608	0.833077	-0.0175616	1	-3.28333	1.99817	0.0816727	-0.519213	0.468806
DSG2	LS-MS	DSG2_2	HGLibA_14025	CTAAACATCCTCATTTAGTG	27.6237	1.9895	0.00134511	0.219312	0.0275748	0.352147	1.00026	0.784438	0.0931492	0.939035
DSG2	LS-MS	DSG2_4	HGLibB_14002	GGGATTACAGAGCCACCTTT	-0.0726144	1.02509	0.953633	-0.000339071	1	0.530784	1.02534	0.687585	0.0309005	0.835289
F11R	LS-MS	F11R_1	HGLibA_16846	TCTCGCAGTGGAGCGGAATG	1.0964	1.00392	0.47019	0.103078	0.683333	64.7026	1.96882	0.0002665	0.390548	0.0087292
F11R	LS-MS	F11R_2	HGLibA_16847	GTTATTATAGCAAACGAGTC	-0.0033449	1.05196	0.99785	-0.00112443	1	20.1639	1.04014	0.028194	0.580929	0.256879
FOLR1	LS-MS	FOLR1_1	HGLibA_18782	AGGGTTTAACAAGTGCGCAG	0.0984894	1.61686	0.932352	0.0100398	1	0.197954	1.01654	0.875182	0.022855	1
FOLR1	LS-MS	FOLR1_2	HGLibA_18783	CCCCCATCCAGTGTCGACCC	0.217412	1.03717	0.862723	0.0141895	1	-3.7914	1.54182	0.0931269	-0.414949	0.468806
IGF2R	Selected protein-related	IGF2R_1	HGLibA_31096	CTTACCTCTCTCCGCTCCGA	-7.68771	1.06912	0.0725321	-0.237048	0.495636	-0.258068	1.01326	0.838787	-0.142693	0.989648
IGF2R	Selected protein-related	IGF2R_2	HGLibA_31097	GGCTTGTCCTGAGTTACGTG	-33.2521	1.98997	0.000929393	-0.201401	0.0275748	-2.48405	1.00077	0.243491	-0.70866	0.645669
IGSF3	LS-MS	IGSF3_1	HGLibA_31180	AGTTGGCTGGACGTTGACCA	-10.4785	1.99897	0.0090008	-0.0589226	0.123011	2.1274	1.00154	0.279434	0.285621	0.645669
IGSF3	LS-MS	IGSF3_2	HGLibA_31181	CCTCGCAGTAGAATTCGCCC	-7.63257	1.99851	0.0167711	-0.0732093	0.172212	-0.549547	1.00053	0.680063	-0.357222	0.834301
ITGA1	LS-MS	ITGA1_1	HGLibA_32002	GGCCAACCCAAAAACAGAAC	-1.40931	1.01577	0.390245	-0.121979	0.683333	-0.202262	1.04721	0.871793	-0.270611	1
ITGA1	LS-MS	ITGA1_2	HGLibA_32003	GGTAGATCCAACTTTACACA	0.782823	1.01161	0.57595	0.0735284	0.755646	0.193334	1.01116	0.878151	0.0266214	1
ITGA5	LS-MS	ITGA5_1	HGLibA_32023	GGGGCAACAGTTCGAGCCCA	-2.14149	1.01366	0.275462	-0.119437	0.683333	-0.637245	1.04541	0.635027	-0.339498	0.78996
ITGA5	LS-MS	ITGA5_2	HGLibA_32024	GGAGCCACTGAGCGACCCCG	-1.862	1.00925	0.312015	-0.134976	0.683333	-1.97978	1.01059	0.295732	-0.133861	0.645669
ITGA6	LS-MS	ITGA6_1	HGLibA_32026	TCAAACTCGATCCGCGTGCA	-3.39753	1.04105	0.174351	-0.363259	0.683333	-5.77318	1.19326	0.0813606	-0.722909	0.468806
ITGA6	LS-MS	ITGA6_2	HGLibA_32027	AGTGGAAGCGCTTCTGCCCG	0.563135	1.10408	0.666194	0.0334227	0.867109	-2.64949	1.29507	0.181463	-0.0323174	0.645669
ITGAV	LS-MS	ITGAV_1	HGLibA_32050	AGCATCTGTGAGGTCGAAAC	-28.0246	1.98804	0.00131229	-0.221094	0.0275748	-6.70189	1.01761	0.0914833	-0.456943	0.468806
ITGAV	LS-MS	ITGAV_2	HGLibA_32051	TAGCCGGATGTTTCTTCTCG	-7.00216	1.99953	0.0198044	-0.0365185	0.191054	0.322153	1.00232	0.801499	0.0331168	0.952506
ITGB1	LS-MS	ITGB1_1	HGLibA_32056	TGCTGTGTGTTTGCTCAAAC	-13.0863	1.99819	0.0058089	-0.079011	0.0952659	3.13741	1.00135	0.196162	0.45748	0.645669
ITGB1	LS-MS	ITGB1_2	HGLibA_32057	ATCTCCAGCAAAGTGAAACC	-3.08116	1.5967	0.119768	-0.599829	0.595211	-7.06296	1.00117	0.0893543	-1.61914	0.468806
ITGB5	LS-MS	ITGB5_1	HGLibA_32077	CACTTACCCAATGCACGGAT	-7.63073	1.99756	0.0168012	-0.0986419	0.172212	-33.5593	1.94927	0.0010257	-0.457398	0.0160178
ITGB5	LS-MS	ITGB5_2	HGLibA_32078	CCTCATCTCCTCCGCGAGTT	3.64065	1.3631	0.116481	0.118127	0.595211	-0.813708	1.00773	0.564315	-0.209959	0.711905
LDLR	Selected protein-related	LDLR_1	HGLibA_34525	GGCACTCGTAGCCGATCTTA	-1.94144	1.09936	0.28498	-0.0317892	0.683333	2.17847	1.12274	0.251762	0.157467	0.645669
LDLR	Selected protein-related	LDLR_2	HGLibA_34526	GTGGCCCAGCGAAGATGCGA	121.524	1.8868	0.000108498	0.744216	0.0177936	6.14475	1.00113	0.102514	0.902493	0.468806
LIFR	LS-MS	LIFR_1	HGLibA_34764	TATGTTTGAAACGACCATCC	1.68062	1.00707	0.340416	0.149314	0.683333	-1.6327	1.00571	0.348825	-0.146872	0.645669
LIFR	LS-MS	LIFR_2	HGLibA_34765	GTCCCGTTCTTGTTATCAGT	-23.7697	1.99251	0.00179885	-0.175737	0.0327791	-0.942193	1.00051	0.518879	-0.395169	0.65966
LRP1	LS-MS	LRP1_1	HGLibA_35484	CTGCCCAGACGGATCTGACG	1.28927	1.02074	0.416718	0.0772971	0.683333	-0.00256904	1.5358	0.998243	-0.00282191	1
LRP1	LS-MS	LRP1_2	HGLibA_35485	AAAGTCCTTACCTCGGCAGT	-1.02526	1.55164	0.438458	-0.098535	0.683333	-3.46932	1.57319	0.102909	-0.352833	0.468806
LRP1B	Selected protein-related	LRP1B_1	HGLibA_35496	ACCCAATTCGTATGCAAAAG	-0.235736	1.01958	0.852042	-0.0127422	1	-19.4507	1.99574	0.00265889	-0.117856	0.033543
LRP1B	Selected protein-related	LRP1B_2	HGLibA_35497	AGACACAAGTCACGTGATCG	-5.00728	1.04121	0.118294	-0.148957	0.595211	-4.46422	1.00463	0.139424	-0.431759	0.531758
LRP2	LS-MS	LRP2_1	HGLibA_35499	CACGTCAGAGACTGCCCCGA	-30.6389	1.98664	0.00110368	-0.230227	0.0275748	-6.31218	1.00752	0.0987796	-0.683821	0.468806
LRP2	LS-MS	LRP2_2	HGLibA_35500	CGCGTCATCTGAACAGTCTT	-4.49225	1.96183	0.0478173	-0.143909	0.356456	-23.9446	1.07042	0.0215714	-0.589434	0.221107
LRP6	LS-MS	LRP6_1	HGLibA_35517	TGCCATAGATTACGATCCTG	0.160275	1.00205	0.898786	0.0162405	1	-6.48146	1.01984	0.0942472	-0.832661	0.468806
LRP6	LS-MS	LRP6_2	HGLibA_35518	TGGTTCTGACCGTGTAGTAT	-4.19771	1.99945	0.0523607	-0.0405781	0.373355	-1.89568	1.00284	0.308486	-0.462024	0.645669
MERTK	LS-MS	MERTK_1	HGLibA_37194	CTCACCTCTACGCCAGAGCG	-1.8462	1.01009	0.31413	-0.130238	0.683333	-1.78464	1.00269	0.324648	-0.256778	0.645669
MERTK	LS-MS	MERTK_2	HGLibA_37195	TTTCAGGCTGTTCGTTAACA	-3.19666	1.15245	0.165922	-0.0490262	0.683333	6.29428	1.37358	0.056095	0.231678	0.418162
Nectin4	LS-MS	PVRL4_3	HGLibA_47920	TGCCTAGCCGCAGCATGAAT	33.7963	1.05461	0.0157177	0.794403	0.172212	232.801	1.69686	8.02328e-05	1.34763	0.00545858
Nectin4	LS-MS	PVRL4_5	HGLibB_40581	TTACCGTGTCCAGTTGTATG	3.35141	1.00007	0.184587	1.45883	0.683333	501.061	1.43143	9.9852e-05	2.25387	0.00545858
OCLN	LS-MS	OCLN_1	HGLibA_41541	AGTGTAGGCTACCCTTATGG	-3.35666	1.5144	0.113266	-0.105311	0.595211	-5.02571	1.05278	0.115934	-0.53106	0.486409
OCLN	LS-MS	OCLN_2	HGLibA_41542	ACGTAGAGTCCAGTAGCTGC	-4.64968	1.09369	0.118872	-0.105353	0.595211	-0.544939	1.00931	0.681685	-0.244995	0.834301
PLXNA2	LS-MS	PLXNA2_1	HGLibA_45548	TGTGAGCAGTATACGACTTG	-30.6008	1.99014	0.00109573	-0.202934	0.0275748	0.643794	1.00037	0.635822	0.169619	0.78996
PLXNA2	LS-MS	PLXNA2_2	HGLibA_45549	GCGATACCCGCAGATAGATC	0.0120753	1.29695	0.991952	0.0019816	1	-5.83611	1.01122	0.106126	-0.418893	0.470398
PLXNB2	LS-MS	PLXNB2_1	HGLibA_45557	ACCGCGAGTCGCCCTTGCAC	-2.63646	1.01962	0.226907	-0.16467	0.683333	-7.24916	1.29423	0.0527216	-0.573361	0.41173
PLXNB2	LS-MS	PLXNB2_2	HGLibA_45558	CCCGGTGCAAGGGCGACTCG	0.00686283	1.00351	0.995628	0.0140604	1	2.60611	1.05565	0.222519	0.356256	0.645669
PRSS8	LS-MS	PRSS8_1	HGLibA_47261	CACGTCTCACGACTGATCAG	-4.55168	1.0116	0.135535	-0.334599	0.635078	-6.54839	1.60604	0.0380117	-1.35583	0.328101
PRSS8	LS-MS	PRSS8_2	HGLibA_47262	TGCCACCTGTGATGCGTGCT	0.814099	1.00273	0.564712	0.0880063	0.752949	33.8386	1.99174	0.000893112	0.210567	0.0160178
PTPRF	LS-MS	PTPRF_1	HGLibA_47789	TCATCTCGCTGCACCCGCAA	-5.06178	1.99935	0.0369084	-0.0444999	0.304185	-6.70846	1.03388	0.088887	-0.408833	0.468806
PTPRF	LS-MS	PTPRF_2	HGLibA_47790	TCCTTCGTGTGCCAAGCTAC	-11.6472	1.20377	0.0348027	-0.185251	0.304185	-2.11783	1.00123	0.280601	-0.474111	0.645669
SDK2	LS-MS	SDK2_1	HGLibA_51441	GCGGGATCTTGCGGCCGTCC	0.53797	1.00388	0.685512	0.0633845	0.878312	-36.2538	1.97568	0.00081635	-0.304178	0.0160178
SDK2	LS-MS	SDK2_2	HGLibA_51442	TGCAACGGTAAAAGCCAGCG	-0.692748	1.72792	0.569699	-0.0133906	0.753473	-6.66403	1.07069	0.0841049	-0.75192	0.468806
SLC1A3	LS-MS	SLC1A3_1	HGLibA_52800	AGCACCCACAAGCGTTTCGT	-6.48166	1.0149	0.0950305	-0.5979	0.577222	-125.805	1.61853	0.000319361	-1.52019	0.0087292
SLC1A3	LS-MS	SLC1A3_2	HGLibA_52801	AGCTCATTCTGTATGGTCGG	-74.2194	1.89061	0.000271196	-0.70734	0.022238	-123.608	1.68514	0.00024695	-1.33096	0.0087292
SMPDL3B	LS-MS	SMPDL3B_1	HGLibA_54105	CTATGACGCGATGATGCTTC	3.24833	1.99993	0.0831294	0.019201	0.539685	30.7954	1.9927	0.00107437	0.198835	0.0160178
SMPDL3B	LS-MS	SMPDL3B_2	HGLibA_54106	AAGCATCATCGCGTCATAGC	-1.6272	1.01299	0.348484	-0.127807	0.683333	-37.6892	1.97262	0.000763064	-0.324595	0.0160178
SORT1	LS-MS	SORT1_1	HGLibA_54485	CCGGGACTTCGTCGCCAAGC	-0.816952	1.48428	0.524259	-0.0567842	0.704742	-19.7666	1.05847	0.0273627	-0.780412	0.256879
SORT1	LS-MS	SORT1_2	HGLibA_54486	CTGCGGACGGCCTCTCGCGC	0.807204	1.99959	0.504301	0.073469	0.683515	-4.01049	1.00691	0.154243	-0.290868	0.574907
TFRC	LS-MS	TFRC_1	HGLibA_57483	AAATTCATATGTCCCTCGTG	-7.27535	1.009	0.0855598	-0.533758	0.539685	-4.12291	1.44665	0.0909262	-0.764745	0.468806
TFRC	LS-MS	TFRC_2	HGLibA_57484	TCTATAGTGATTGTCAGAGC	-1.36409	1.21074	0.372377	-0.182775	0.683333	-2.85574	1.003	0.21383	-0.389273	0.645669
TPBG	LS-MS	TPBG_1	HGLibA_59386	CGTTAACCGCAATCTGACCG	-2.18446	1.31003	0.223533	-0.0261012	0.683333	-0.115283	1.00207	0.926902	-0.107702	1
TPBG	LS-MS	TPBG_2	HGLibA_59387	TGCGGAAGGACACGTAGGTC	-1.90926	1.99993	0.196436	-0.00921874	0.683333	-2.12272	1.00138	0.280005	-0.533616	0.645669
VLDLR	LS-MS	VLDLR_1	HGLibA_61970	CCATGGGCACGTCCGCGCTC	0.059626	1.02698	0.961891	0.00422107	1	-3.14776	1.56889	0.118636	-0.288584	0.486409
VLDLR	LS-MS	VLDLR_2	HGLibA_61971	TCCTCACTCACCGGTTCCGG	-1.463	1.00591	0.380697	-0.110612	0.683333	-2.95945	1.79143	0.111197	-0.296677	0.479902

## Sheet: Table 4
Suppementary Table 4. Antibody used in the present study
Target	monoclonal or polyclonal	clone or catalogue #	host	source
Nectin-4	monoclonal	Enfortumab	human	Selleck Chemicals, Houston, TX, USA
Nectin-4	monoclonal	EPR15613-68	rabbit	Abcam, Cambridge, UK
Nectin-4	polyclonal	AF2659	goat	R&D systems, McKinley, NE, USA
MOG	monoclonal	8-18C5	mouse	Merck, Darmstadt, Germany
Nectin-1	monoclonal	R1.302	mouse	BioLegend, San Diego, CA, USA
Nectin-2	monoclonal	TX1	mouse	MBL, Nagoya, Japan
Nectin-3	monoclonal	N3.12.4	mouse	Merck, Darmstadt, Germany
GAPDH	monoclonal	3H12	mouse	MBL, Nagoya, Japan
DYKDDDDK-tag	monoclonal	1E6	mouse	FUJIFILM Wako Pure Chemical, Osaka, Japan
cytokeratin 5	monoclonal	1A1C5	mouse	Proteintech, Rosemont, IL, USA
acetyl-α-tubulin (Lys40)	monoclonal	6-11B-1	mouse	Sigma-Aldrich, St. Louis, MO, USA
mucin 5AC	monoclonal	45M1	mouse	Abcam, Cambridge, UK
CC10	monoclonal	E-11	mouse	Santa Cruz Biotechnology, Dallas, TX, USA
CD138/SDC1	monoclonal	44F9	mouse	Miltenyi Biotec, Bergisch Gladbach, Germany
E-Cadherin	monoclonal	24E10	rabbit	Cell Signaling Technology, Danvers, MA, USA
hCGβ	polyclonal	11615-1-AP	rabbit	Proteintech, Rosemont, IL, USA
RuV C	monoclonal	9B11	mouse	Abcam, Cambridge, UK
RuV C	monoclonal	57D5	mouse	This study, MAB Institute, Japan
RuV E2	monoclonal	26-24	mouse	GenWay, San Diego, CA, USA
RuV E1	monoclonal	2Q2070	mouse	US Biologicals, Salem, MA, USA
RuV E1	monoclonal	85	mouse	Umino et al., 1985
RuV E1	monoclonal	89	mouse	Umino et al., 1985
RuV E1	monoclonal	104	mouse	Umino et al., 1985
VSV-G	monoclonal	8G5F11	mouse	Kerafast, Boston, MA, USA
HCoV 229E	polyclonal		rabbit	Shirato et al., 2012
human IgG1	monoclonal	CB1	mouse	MBL, Nagoya, Japan
mouse IgG1	monoclonal	2E12	mouse	MBL, Nagoya, Japan
mouse IgG2a	monoclonal	6H3	mouse	MBL, Nagoya, Japan
Normal goat IgG	polyclonal		goat	This study
GAPDH, HRP-conjugated	monoclonal	5A12	mouse	FUJIFILM Wako Pure Chemical, Osaka, Japan
α-tubulin, HRP-conjugated	polyclonal	PM054-7	rabbit	FUJIFILM Wako Pure Chemical, Osaka, Japan
rabbit IgG (H+L), HRP-conjugated	polyclonal	#32460	goat	Thermo Fisher Scientific, Waltham, MA, USA
mouse IgG (H+L), HRP-conjugated	polyclonal	#32430	goat	Thermo Fisher Scientific, Waltham, MA, USA
mouse IgG (H+L), Alexa Fluor 488-conjugated	polyclonal	A11001	goat	Thermo Fisher Scientific, Waltham, MA, USA
human IgG (H+L), Alexa Fluor 488-conjugated	polyclonal	A11013	goat	Thermo Fisher Scientific, Waltham, MA, USA
goat IgG (H+L), Alexa Fluor 488-conjugated	polyclonal	A11055	donkey	Thermo Fisher Scientific, Waltham, MA, USA
rabbit IgG (H+L), Alexa Fluor 488-conjugated	polyclonal	A11008	donkey	Thermo Fisher Scientific, Waltham, MA, USA
rabbit IgG (H+L), Alexa Fluor 594-conjugated	polyclonal	A21207	donkey	Thermo Fisher Scientific, Waltham, MA, USA
human IgG (H+L), Alexa Fluor 647-conjugated	polyclonal	A21445	goat	Thermo Fisher Scientific, Waltham, MA, USA
mouse IgG, PE-conjugated	polyclonal	405307	goat	BioLegend, San Diego, CA, USA
